# Supplementary material
Source: PubMed Central journal article supplement (PMC3230550)

**Supplemental Table 1: Compilation of the results of the specificity analyses with different antibodies.** In this table the antibody number (referring to Suppl. Tab. 2), the antibody target site, the specificity factor for binding at the target site ( $SF_T$ ) and for the best non-target site ( $SF_N$ ) and the ratio of both are given. The example pictures show both duplicates of each array. On the left side spots are annotated as follows: all peptides containing the primary PTM are shaded in green, false negatives (or very weakly bound peptides which contain the primary PTM) are highlighted with red arrows. False positives are encircled in orange or violet color. The secondary PTMs present in the false negative and false positive spots are specified in the comments column.

| No. | Antibody target site | SF target site ( $SF_T$ ) | SF best non-target site ( $SF_N$ ) | $\frac{SF_T}{SF_N}$ | Example of an image of the array | Comments                                                                                                                            |
|-----|----------------------|---------------------------|------------------------------------|---------------------|----------------------------------|-------------------------------------------------------------------------------------------------------------------------------------|
| 1   | H3K4me1              | 30                        | 3                                  | 10                  |                                  | <p>False Negatives contain <b>H3R2me2s</b>, <b>H3R2me2a</b> or <b>H3T3ph</b></p> <p>False Positives all contain <b>H4K20me1</b></p> |
| 2   | H3K4me2              | 42                        | 1.3                                | 33                  |                                  | <p>False Positives contain <b>H3K4me1</b> or the double modification <b>H3R26Cit/H3K27me2</b></p>                                   |

|   |         |    |   |    |  |                                                                                                                                                                  |
|---|---------|----|---|----|--|------------------------------------------------------------------------------------------------------------------------------------------------------------------|
| 3 | H3K4me2 | 62 | 3 | 19 |  | <p>False Negatives all contain <b>H3T3ph</b><br/>Weak binding of H3K4me2 in mono- and double modifications</p> <p>False Positives all contain <b>H3K4me1</b></p> |
| 4 | H3K4me3 | 31 | 4 | 9  |  | <p><b>H3T3ph</b> reduces binding</p> <p>False Positives all contain <b>H4K20me3</b></p>                                                                          |
| 5 | H3K4me3 | 32 | 2 | 16 |  | <p><b>H3T3ph</b> reduces binding</p> <p>False Positives all contain <b>H4K20me3</b></p>                                                                          |
| 6 | H3K4me3 | 9  | 3 | 3  |  | <p>False Positives contain <b>H3K4me1/me2/ac</b> or <b>H4K20me3</b></p>                                                                                          |

|    |         |    |    |    |                                                                                                                                                                            |                                                                                                                      |
|----|---------|----|----|----|----------------------------------------------------------------------------------------------------------------------------------------------------------------------------|----------------------------------------------------------------------------------------------------------------------|
| 7  | H3K9ac  | 44 | 1  | 44 | 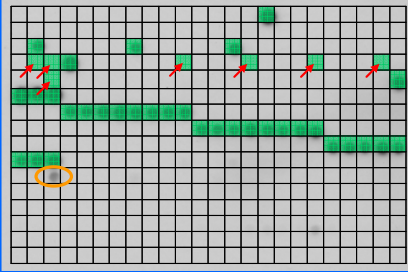      | <p>False Negatives contain H3S10ph or H3T11ph</p> <p>False Positives: one peptide (H3K27ac)</p>                      |
| 8  | H3K9me1 | 19 | 16 | 1  |       | <p>False Negatives contain H3S10ph or H3T11ph</p> <p>False Positives all contain H4K20me1</p>                        |
| 9  | H3K9me3 | 18 | 7  | 2  |     | <p>False Negatives contain H3S10ph or H3T11ph</p> <p>False Positives contain H3K27me3 or H4K20me3</p>                |
| 10 | H3K9me3 | 44 | 1  | 44 |   | <p>False Negatives: one peptide (H3R8me2a, H3K9me3, H3S10ph, H3T11ph)</p> <p>False Positives all contain H3K9me2</p> |

|    |                  |    |    |    |                                                                                      |                                                                                                                                                       |
|----|------------------|----|----|----|--------------------------------------------------------------------------------------|-------------------------------------------------------------------------------------------------------------------------------------------------------|
| 11 | H3K9me3          | 28 | 3  | 11 | 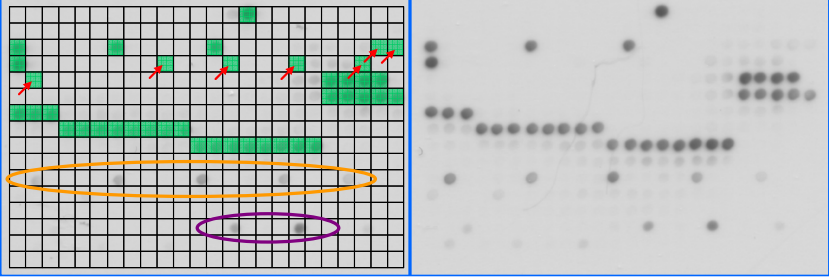   | <p>False Negatives contain<br/>H3S10ph or H3T11ph</p> <p>False Positives contain<br/>H3K27me3 or<br/>H4K20me3</p>                                     |
| 12 | H3K9me3          | 47 | 3  | 15 |    | <p>False Negatives contain<br/>H3S10ph or H3T11ph</p> <p>False Positives contain<br/>H3K27me3 or<br/>H4K20me3</p>                                     |
| 13 | H3K9me3<br>S10ph | 51 | 13 | 4  |   | <p>False Negatives: one<br/>peptide (H3R8me2a,<br/>H3K9me3, H3S10ph,<br/>H3T11ph)</p> <p>False Positives all<br/>contain H3K27me3 and<br/>H3S28ph</p> |
| 14 | H3S10ph          | 48 | 1  | 48 |  | <p>False Negatives contain<br/>H3K9ac or H3T11ph</p>                                                                                                  |

|    |          |     |    |     |  |                                                                                          |
|----|----------|-----|----|-----|--|------------------------------------------------------------------------------------------|
| 15 | H3S10ph  | 46  | 1  | 46  |  | False Negatives all contain H3T11ph; H3K9me2, H3K9me3, H3K9ac and H3K14ac reduce binding |
| 16 | H3S10ph  | 138 | 1  | 138 |  | False Negatives all contain H3T11ph; H3K14ac reduces binding                             |
| 17 | H3K14ac  | 26  | 28 | 1   |  | False Positives contain H3R17me2s, H3R17me2a, H3R17Cit and/or H3K18ac                    |
| 18 | H3K27me2 | 18  | 14 | 1   |  | False Negatives all contain H3S28ph<br><br>False Positives contain H3K4me2 or H4K20me2   |

|    |          |     |    |     |  |                                                                                                              |
|----|----------|-----|----|-----|--|--------------------------------------------------------------------------------------------------------------|
| 19 | H3K27me3 | 34  | 9  | 4   |  | <p>False Negatives contain H3R26me2s, H3R26me2a or H3S28ph</p> <p>False Positives: one peptide (H3K27ac)</p> |
| 20 | H3K27me3 | 36  | 10 | 4   |  | <p>False Positives contain H4K20me3. Weak binding to H3K9me3 or H3K4me3.</p>                                 |
| 21 | H3K27me3 | 172 | 1  | 172 |  | <p>False Negatives all contain H3S28ph</p>                                                                   |
| 22 | H3K27me3 | 74  | 14 | 5   |  | <p>False Negatives all contain H3S28ph</p> <p>False Positives all contain H4K20me3</p>                       |

|    |          |     |    |    |                                                                                      |                                                                                                                               |
|----|----------|-----|----|----|--------------------------------------------------------------------------------------|-------------------------------------------------------------------------------------------------------------------------------|
| 23 | H3K36me2 | 71  | 44 | 2  | 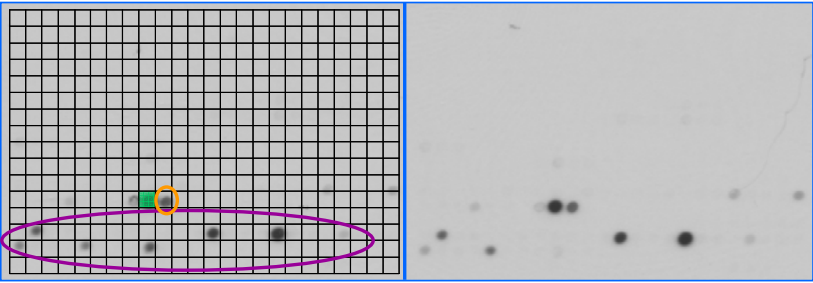   | False Positives contain<br>H3K36me3 or<br>H4K20me2                                                                            |
| 24 | H3K36me3 | 26  | 23 | 1  |    | False Positives contain<br>H4K20me1 or<br>H4K20me3                                                                            |
| 25 | H3K36me3 | a)  | a) | a) |   | H3K36me3 is not bound<br><br>False Positives contain<br>H3K9me3 and H3K14ac<br>(1), H3K9me2 and<br>H3K14ac (2) or<br>H4K20me3 |
| 26 | H3K36ac  | 504 | 6  | 85 |  | False Positives all<br>contain H2bK15ac                                                                                       |

|    |                 |                 |    |     |                                                                                      |                                                                                                                                      |
|----|-----------------|-----------------|----|-----|--------------------------------------------------------------------------------------|--------------------------------------------------------------------------------------------------------------------------------------|
| 27 | H3-Pan-Kme2/me3 | 9 <sup>b)</sup> | 19 | 1   | 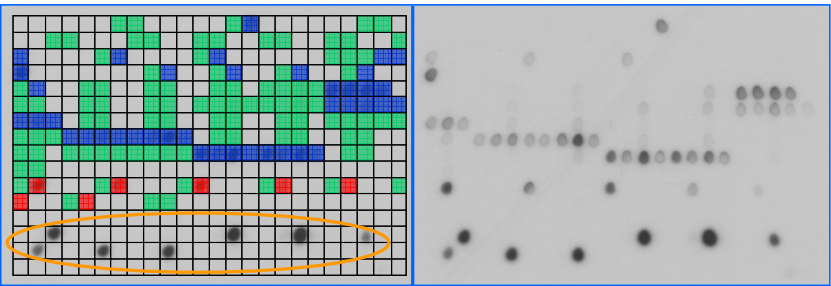   | <p>H3K9me3, H3K27me3, all other H3Kme2/me3 peptides</p> <p>Binding only to some H3K9me3, H3K27me3 and H4K20me3 (False Positives)</p> |
| 28 | H4R3me2a        | 77              | 3  | 31  |    | False Negatives all contain H4S1ph                                                                                                   |
| 29 | H4K12ac         | 30              | 4  | 8   |   | <p>H4 (1-19) K12ac peptides, H4 (11-30) K12ac peptides</p> <p>False Positives all contain H4K16ac</p>                                |
| 30 | H4K16ac         | 179             | 1  | 179 |  | False Negatives contain H4R17me2s/a or H4R19me2s/a                                                                                   |



|    |            |                  |   |     |                                                                                      |                                                                                                                                                            |
|----|------------|------------------|---|-----|--------------------------------------------------------------------------------------|------------------------------------------------------------------------------------------------------------------------------------------------------------|
| 31 | H4K20me1   | 77               | 6 | 12  | 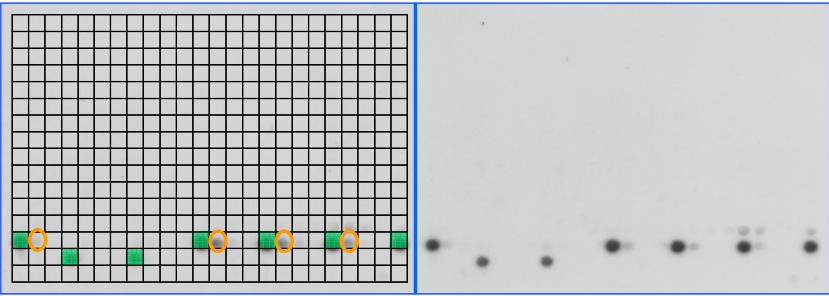   | False Positives all contain H4K20me2                                                                                                                       |
| 32 | H4K20me2   | 228              | 4 | 61  |    | False Positives all contain H4K20me1                                                                                                                       |
| 33 | H4K20me3   | 155              | 1 | 155 |   |                                                                                                                                                            |
| 34 | H4-Pan-Kac | 25 <sup>e)</sup> | 4 | 6   |  | <p>H4K5ac, H4K8ac or H4K12ac peptides</p> <p>Weak binding to monoacetylated peptides</p> <p>False Positives contain di- and triacetylated H2b peptides</p> |

|    |            |                  |    |    |  |                                                                                                                                                        |
|----|------------|------------------|----|----|--|--------------------------------------------------------------------------------------------------------------------------------------------------------|
| 35 | H4-Pan-Kac | 14 <sup>d)</sup> | 3  | 5  |  | <p>H4K5ac, H4K8ac or H4K12ac peptides<br/> Weak binding to monoacetylated peptides<br/> False Positives contain di- and triacetylated H2b peptides</p> |
| 36 | H2aK9ac    | 121              | 10 | 12 |  | <p>False Positives all contain H4K20ac</p>                                                                                                             |

a) not applicable since no specific binding to target

b) calculated for H3K9me3

c) calculated for K8ac or K5ac or K12ac

d) calculated for K12ac or K5ac or K8ac

**Supplemental Table 2: Compilation of technical details of the antibodies used in this study.**

| Antibody No. | Antibody target site | Antibody type <sup>a)</sup> | Supplier and Cat. No. <sup>b)</sup> | Lot No.    | Dilution in experiment |
|--------------|----------------------|-----------------------------|-------------------------------------|------------|------------------------|
| 1            | H3K4me1              | pab                         | AM 39297                            | 21008001   | 1:5000                 |
| 2            | H3K4me2              | pab                         | AM 39141, 39142                     | 168        | 1:10000                |
| 3            | H3K4me2              | pab                         | Mi 07-030                           | DAM1570816 | 1:20000                |
| 4            | H3K4me3              | pab                         | AM 39159                            | 15808002   | 1:100000               |
| 5            | H3K4me3              | pab                         | Ac ab8580                           | 224576     | 1:10000                |
| 6            | H3K4me3              | pab                         | Mi 07-473                           | DAM1661080 | 1:400000               |
| 7            | H3K9ac               | pab                         | Mi 06-942                           | 23997      | 1:10000                |
| 8            | H3K9me1              | pab                         | AM 39249, 39250                     | 07408001   | 1:10000                |
| 9            | H3K9me3              | pab                         | Ac ab8898                           | 484099     | 1:20000                |
| 10           | H3K9me3              | mab                         | Ac ab6001                           | 389293     | 1:500                  |
| 11           | H3K9me3              | pab                         | AM 39161                            | 170        | 1:2000                 |
| 12           | H3K9me3              | pab                         | CS 9754                             | 1          | 1:1000                 |
| 13           | H3K9me3S10ph         | mab                         | Mi 04-809                           | NG1585093  | 1:500                  |
| 14           | H3S10ph              | pab                         | AM 39253                            | 08308001   | 1:2000                 |
| 15           | H3S10ph              | pab                         | CS 9701                             | 1          | 1:500                  |
| 16           | H3S10ph              | pab                         | Mi 06-570                           | 21714      | 1:10000                |
| 17           | H3K14ac              | pab                         | Mi 06-911                           | 22854      | 1:10000                |
| 18           | H3K27me2             | pab                         | AM 39245, 39246                     | 07408001   | 1:10000                |
| 19           | H3K27me3             | mab                         | AM 39536                            | 09508002   | 1:500                  |
| 20           | H3K27me3             | pab                         | AM 39155_0                          | 199        | 1:2000                 |
| 21           | H3K27me3             | mab                         | Ac ab6002                           | 398310     | 1:500                  |
| 22           | H3K27me3             | pab                         | Mi 07-449                           | DAM1662421 | 1:20000                |
| 23           | H3K36me2             | pab                         | AM 39255                            | 08308001   | 1:5000                 |
| 24           | H3K36me3             | pab                         | Ac ab9050                           | 481641     | 1:5000                 |
| 25           | H3K36me3             | mab                         | Mi 04-801                           | DAM1564369 | 1:500                  |
| 26           | H3K36ac              | pab                         | AM 39379, 39380                     | 29108001   | 1:100000               |
| 27           | H3-Pan-Kme2/me3      | pab                         | Mi 07-756                           | 30618      | 1:20000                |
| 28           | H4R3me2a             | pab                         | AM 39705                            | 03910002   | 1:5000                 |
| 29           | H4K12ac              | pab                         | Mi 06-761                           | 27657      | 1:10000                |
| 30           | H4K16ac              | pab                         | Mi 07-329                           | DAM1675759 | 1:100000               |
| 31           | H4K20me1             | pab                         | Ac ab9051                           | 713902     | 1:20000                |
| 32           | H4K20me2             | pab                         | AM 39173, 39174                     | 135        | 1:10000                |

|    |            |     |                 |          |          |
|----|------------|-----|-----------------|----------|----------|
| 33 | H4K20me3   | pab | AM 39180, 39181 | 136      | 1:100000 |
| 34 | H4-Pan-Kac | pab | AM 39243        | 05308001 | 1:20000  |
| 35 | H4-Pan-Kac | pab | Mi 06-598       | 29867    | 1:10000  |
| 36 | H2aK9ac    | pab | AM 39109, 39110 | 257      | 1:100000 |

<sup>a)</sup> mab: monoclonal antibody; pab: polyclonal antibody

<sup>b)</sup> Ac: Abcam; AM: Active Motif; CS: Cell Signaling; Mi: Millipore

## Detailed specificity analysis of antibodies binding to modified Histone tails with peptide arrays

Ina Bock<sup>1</sup>, Arunkumar Dhayalan<sup>1</sup>, Srikanth Kudithipudi<sup>1</sup>, Ole Brandt<sup>2</sup>, Philipp Rathert<sup>3</sup>, & Albert Jeltsch<sup>1,\*</sup>

Supplemental Figure 1: Mass spectra of selected peptides. To confirm correct synthesis of the peptides by mass spectrometric analysis representative peptides were synthesized in parallel according to a standard SPOT-synthesis protocol by using the acid labile Fmoc-Rink linker as first building block which allows cleaving them from the matrix for characterization. After synthesis, the dry CelluSpot discs were punched out and 150  $\mu$ l of the cleavage cocktail (93% (v/v) trifluoroacetic acid (TFA), 4% triisopropylsilane (v/v) and 3% H<sub>2</sub>O (v/v)) was added to each peptide disc for 1.5 h. The supernatants containing the peptides were transferred to new microtubes and dried in a gentle N<sub>2</sub>-stream. The peptides were resolubilized in a mixture of 30% acetonitril in H<sub>2</sub>O containing 0.1 % TFA. Afterwards the peptides were investigated by MALDI/TOF mass spectrometry using an AutoFlex II (Bruker Daltonics, Bremen, Germany). Peptide samples were diluted with 0.1% TFA as appropriate and 1  $\mu$ l applied to one spot on a pre-spotted Anchorchip (PAC) HCCA Plate (Cat. No. 227463, Bruker Daltonics) and washed with 10 mM sodium phosphate / 0.1% TFA solution. Spectra were recorded with default settings using peptide calibration standard mixture with the mass range of 1000 to 4000 Da (Cat. No. 206195, Bruker Daltonics) as mass standard and processed using the FlexAnalysis software (Bruker Daltonics). In the following spectra the m/z ratio in Da is shown on the x-axis and the signal intensity of the ion detector on the y-axis. Peptides are specified by their position in the array (cf. Supplemental information S1), name and the theoretical mass of the MH<sup>+</sup> species.

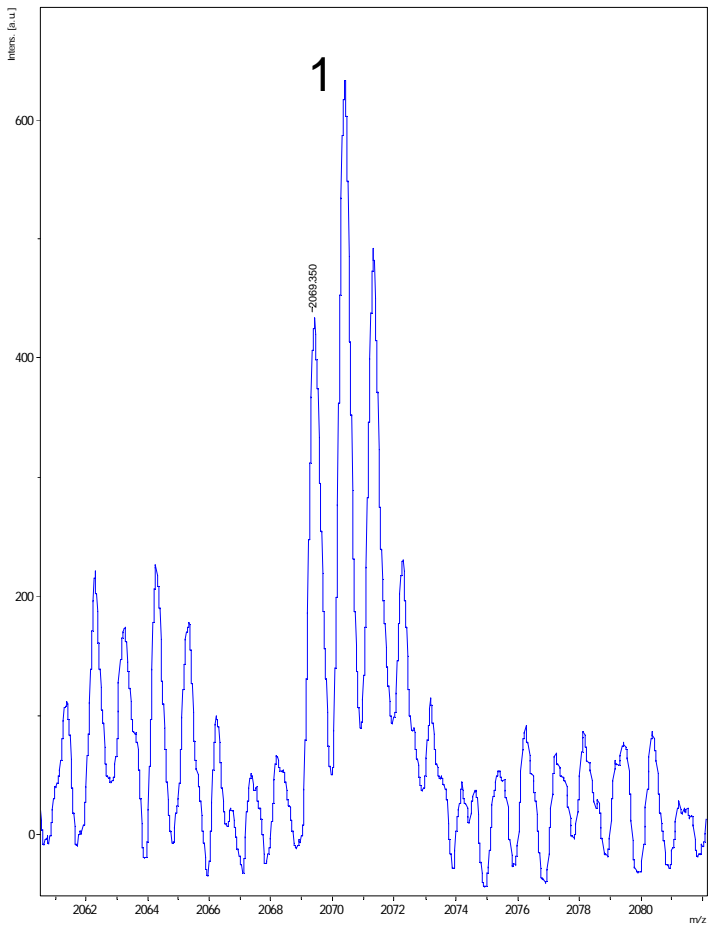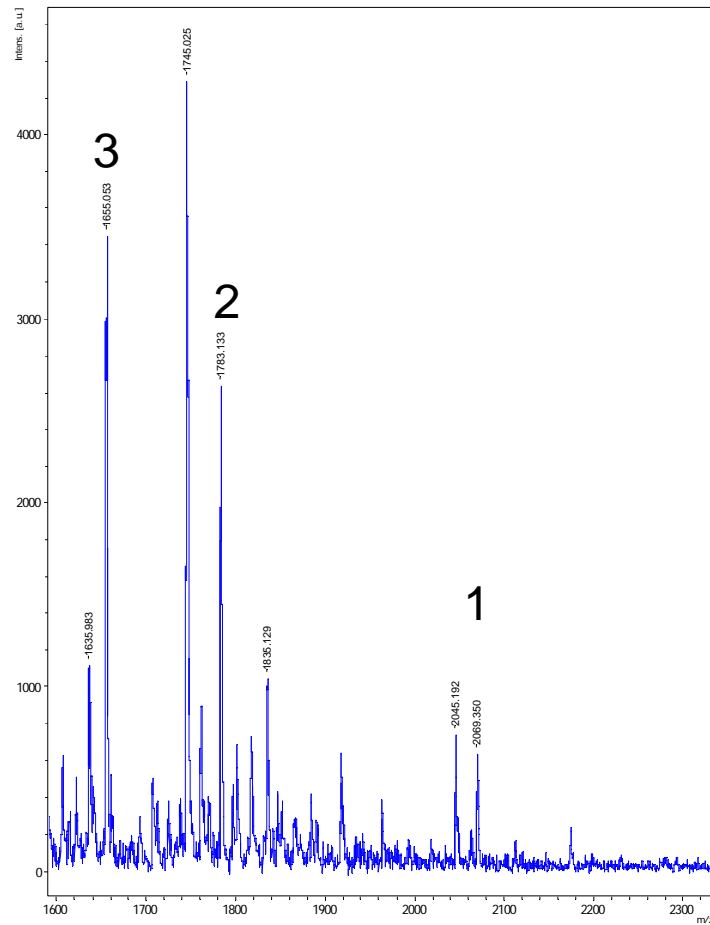

**Peptide A1, H3 1-19, ARTKQTARKSTGGKAPRKQ**

ARTKQTARKSTGGKAPRKQ,  $MH^+=2069.2$  Da (1)

Ac-KQTARKSTGGKAPRKQ,  $MH^+=1783.0$  Da (2)

Ac-QTARKSTGGKAPRKQ,  $MH^+=1654.9$  Da (3)

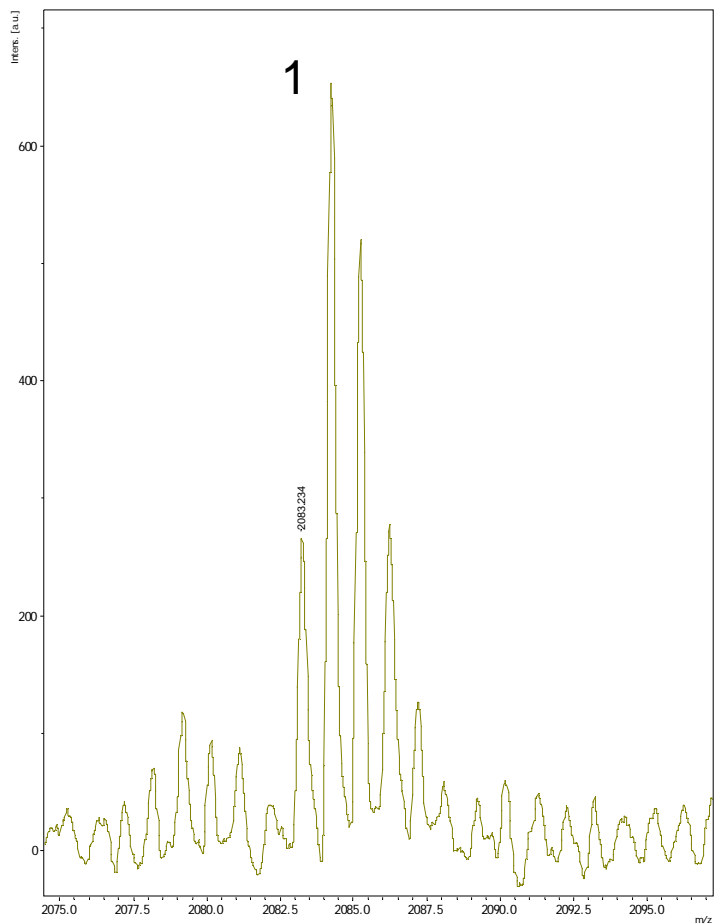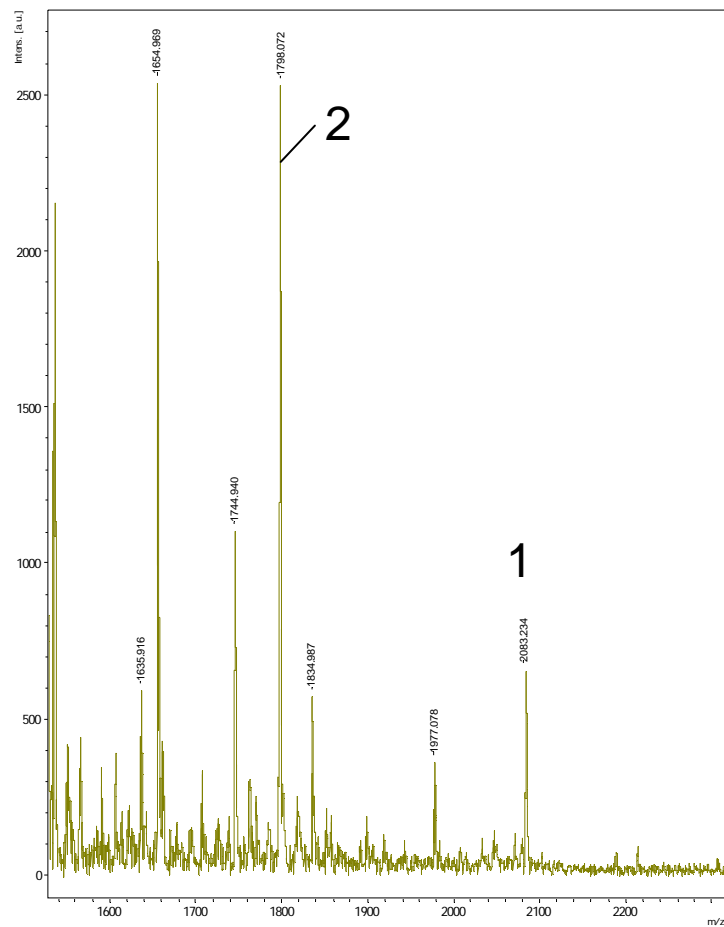

**Peptide A6, H3 1-19 K4me1, ART(K<sup>me1</sup>)QTARKSTGGKAPRKQ**

ART(K<sup>me1</sup>)QTARKSTGGKAPRKQ, MH<sup>+</sup>=2083.2 Da (1)

Ac-(K<sup>me1</sup>)QTARKSTGGKAPRKQ, MH<sup>+</sup>=1797.0 Da (2)

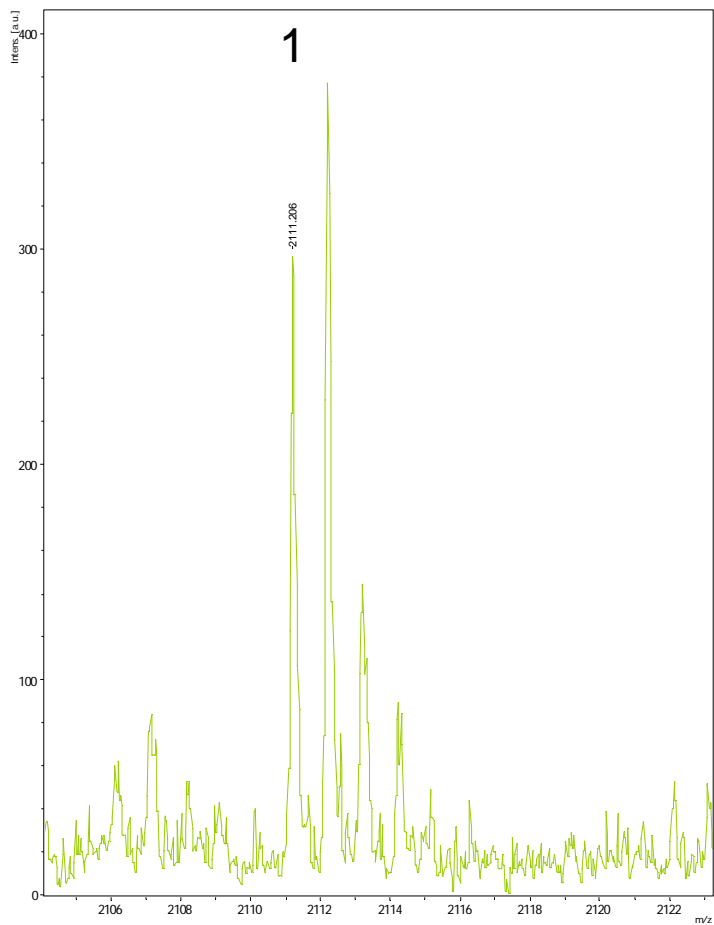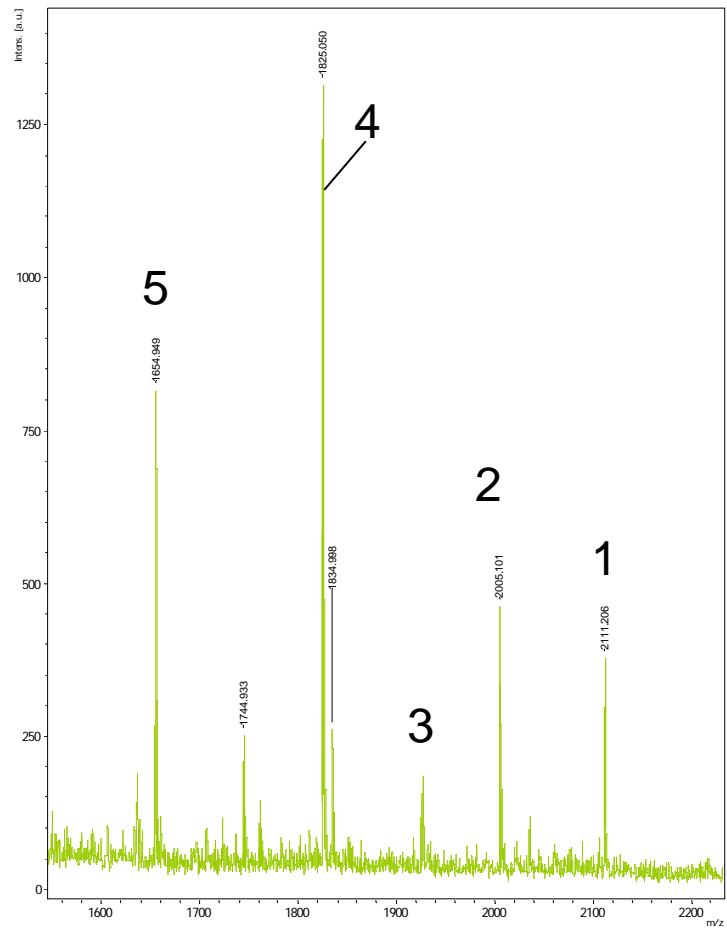

### Peptide A9, H3 1-19 K4Ac, ART(K<sup>ac</sup>)QTARKSTGGKAPRKQ

ART(K<sup>ac</sup>)QTARKSTGGKAPRKQ, MH<sup>+</sup>=2111.2 Da (1)

Ac-RT(K<sup>ac</sup>)QTARKSTGGKAPRKQ-Na<sup>+</sup>, MH<sup>+</sup>=2005.2 Da (2)

Ac-T(K<sup>ac</sup>)QTARKSTGGKAPRKQ, MH<sup>+</sup>=1926.1 Da (3)

Ac-(K<sup>ac</sup>)QTARKSTGGKAPRKQ, MH<sup>+</sup>=1825.0 Da (4)

Ac-QTARKSTGGKAPRKQ, MH<sup>+</sup>=1654.9 Da (5)



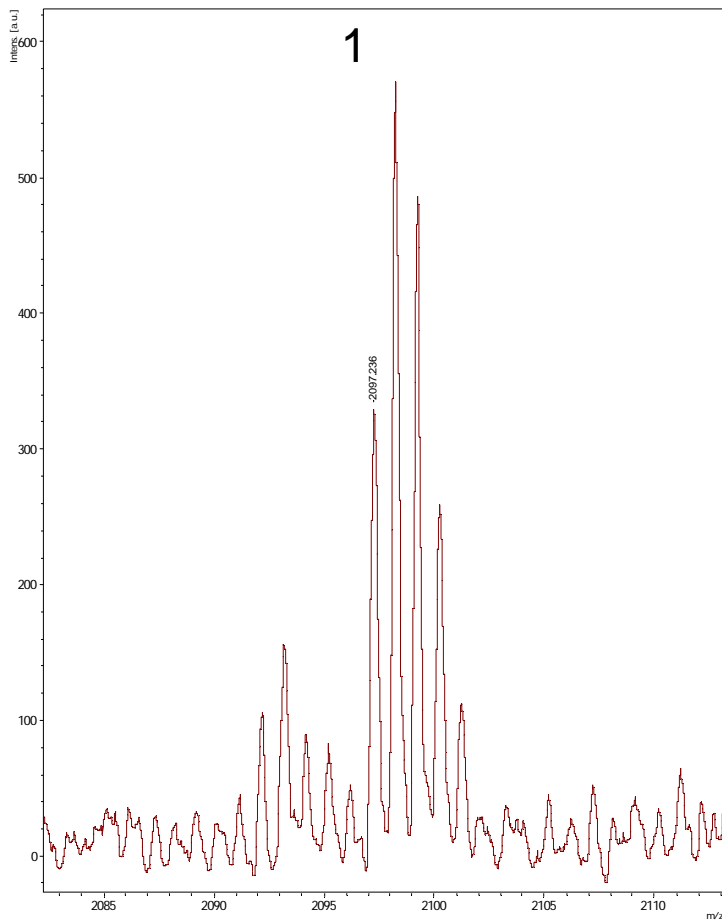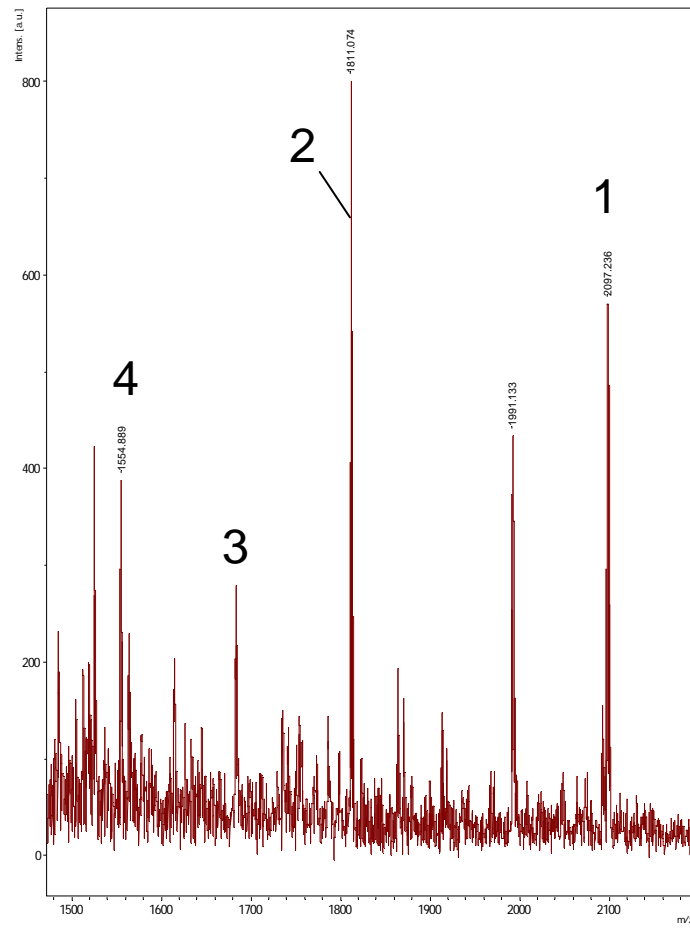

### Peptide A10, H3 1-19 R8me2s, ARTKQTA(R<sup>me2s</sup>)KSTGGKAPRKQ

ARTKQTA(R<sup>me2s</sup>)KSTGGKAPRKQ, MH<sup>+</sup>=2097.2 Da (1)

Ac-KQTA(R<sup>me2s</sup>)KSTGGKAPRKQ, MH<sup>+</sup>=1811.0 Da (2)

Ac-QTA(R<sup>me2s</sup>)KSTGGKAPRKQ, MH<sup>+</sup>=1682.9 Da (3)

Ac-TA(R<sup>me2s</sup>)KSTGGKAPRKQ, MH<sup>+</sup>=1554.9 Da (4)

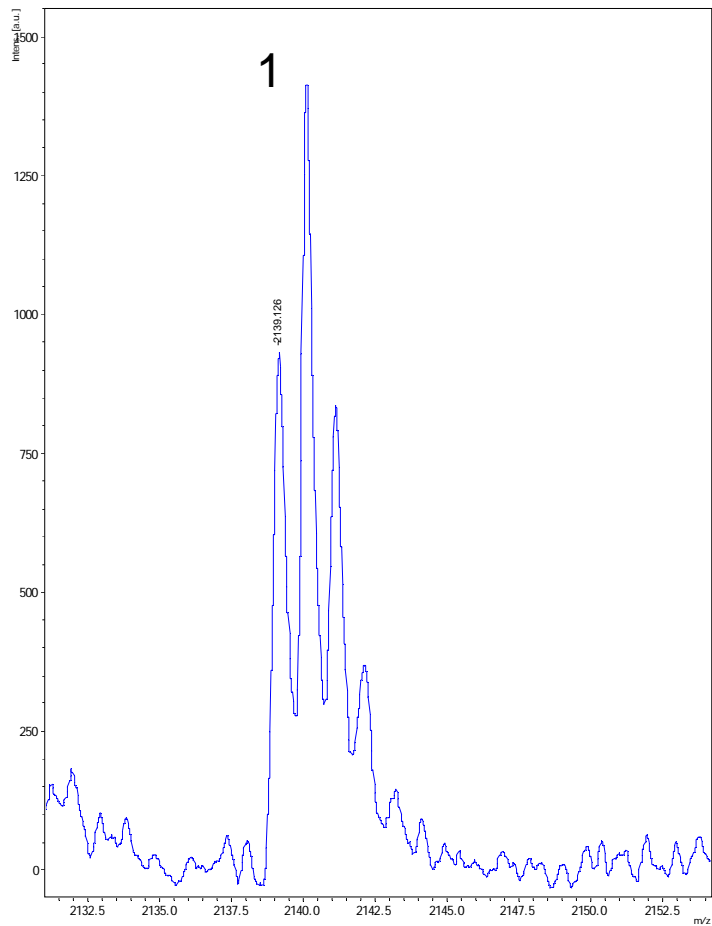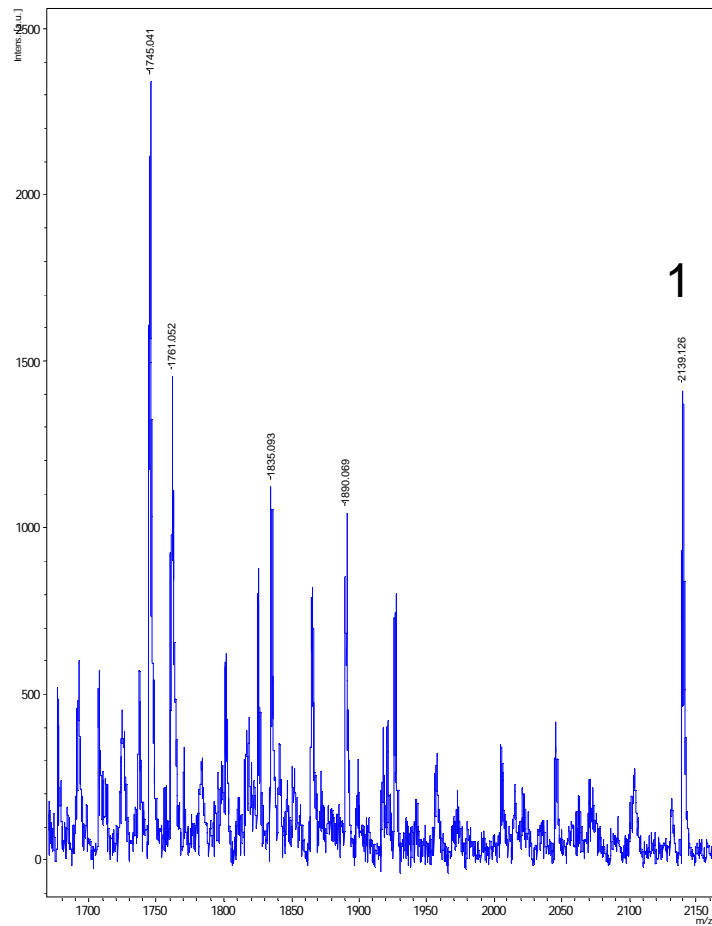

**Peptide A23, H3 1-19 R2me2s/K4me3, A(R<sup>me2s</sup>)T(K<sup>me3</sup>)QTARKSTGGKAPRKQ**  
**A(R<sup>me2a</sup>)T(K<sup>me3</sup>)QTARKSTGGKAPRKQ, MH<sup>+</sup>=2139.2 Da (1)**

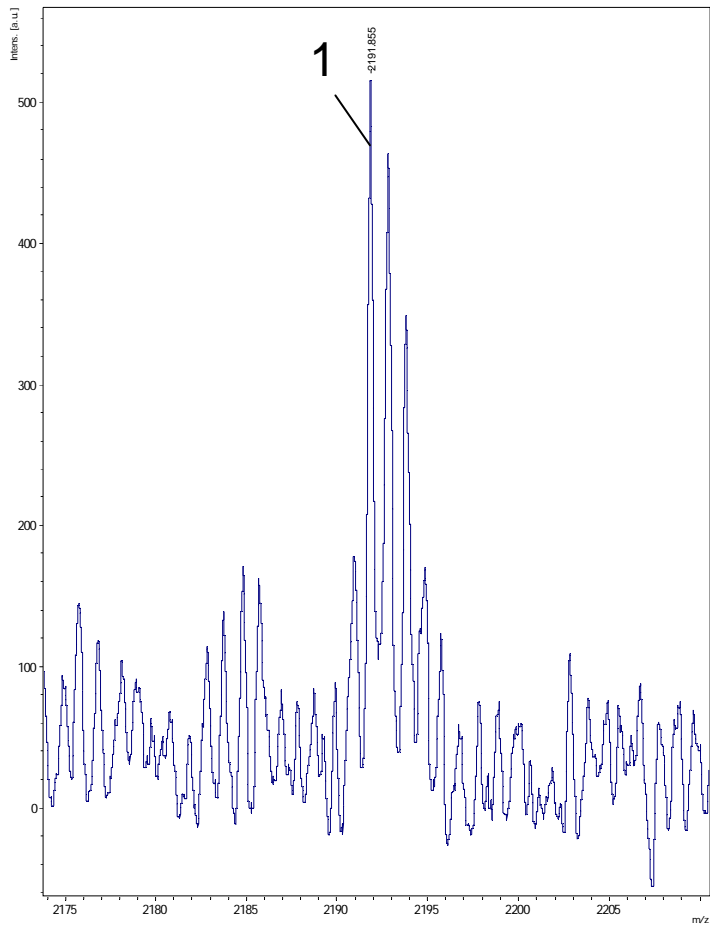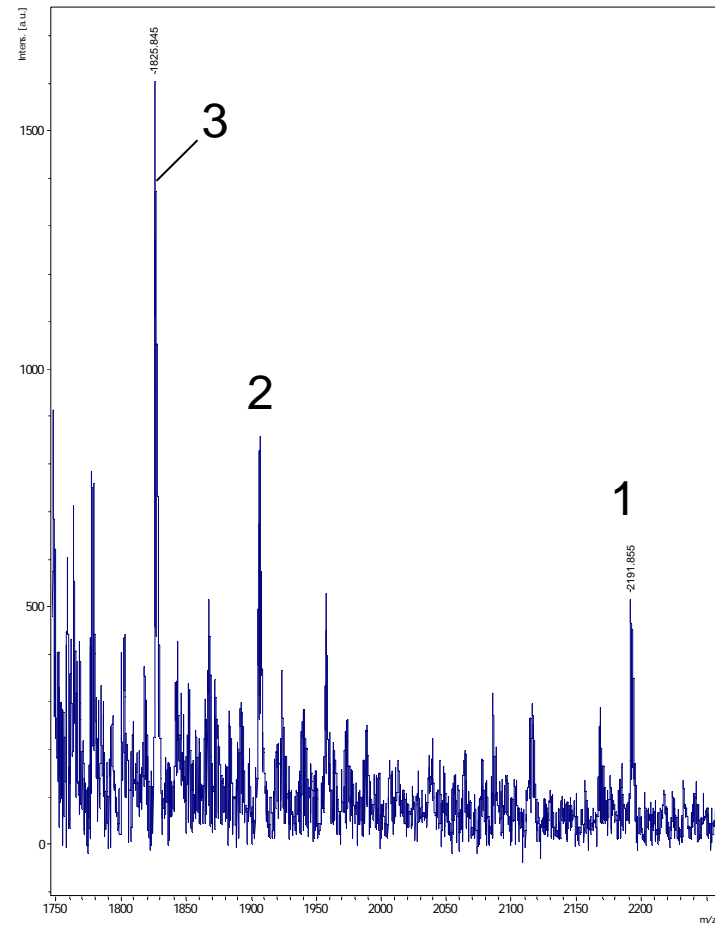

**Peptide C23, H3 1-19 K<sup>me3</sup>/S<sup>ph</sup>, ARTKQ<sup>me3</sup>TAR(S<sup>ph</sup>)TGGKAPRKQ**

ARTKQ<sup>me3</sup>TAR(S<sup>ph</sup>)TGGKAPRKQ, MH<sup>+</sup>=2191.2 Da (1)

Ac-KQ<sup>me3</sup>TAR(S<sup>ph</sup>)TGGKAPRKQ, MH<sup>+</sup>=1905.0 Da (2)

Ac-KQ<sup>me3</sup>STGGKAPRKQ, MH<sup>+</sup>=1825.0 Da (3)

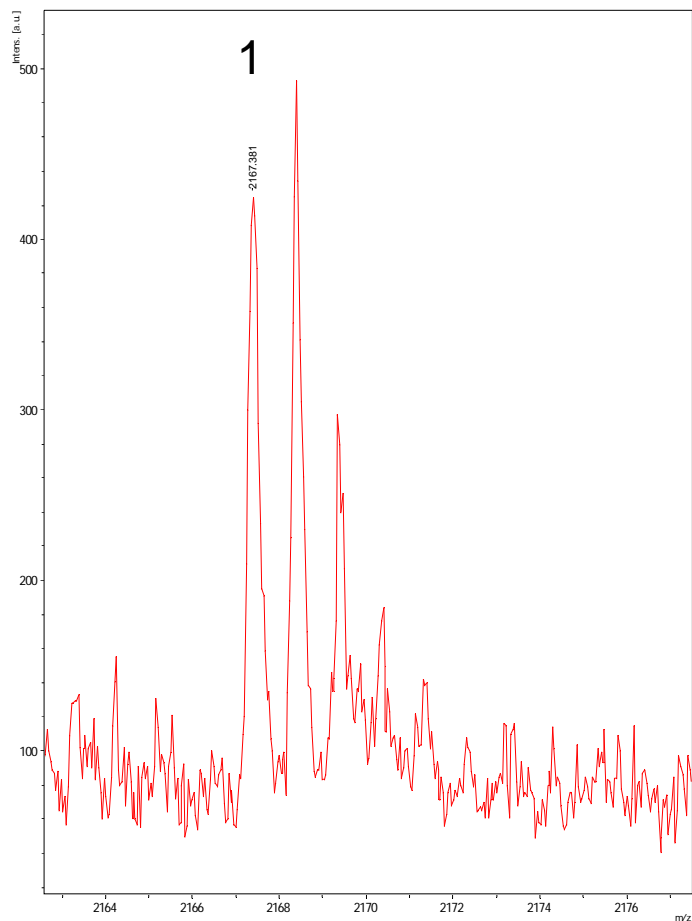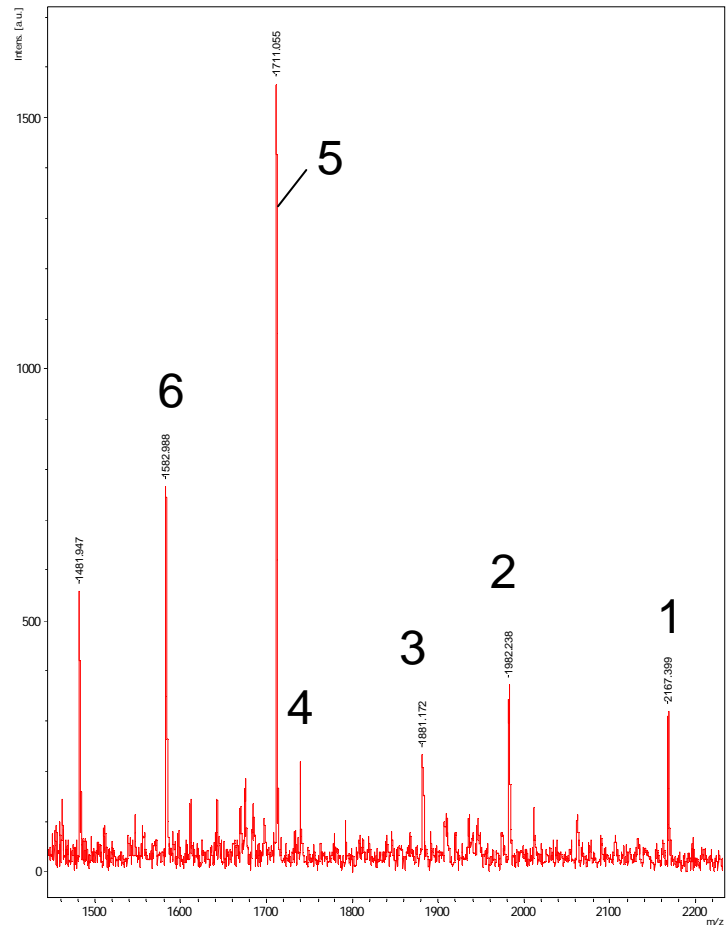

**Peptide F18, H3 1-19 K4me3/R8me2a/K9me2, ART(K<sup>me3</sup>)QTA(R<sup>me2a</sup>)K(<sup>me2</sup>)STGGKAPRKQ**

ART(K<sup>me3</sup>)QTA(R<sup>me2a</sup>)(K<sup>me2</sup>)STGGKAPRKQ, MH<sup>+</sup>=2167.2 Da (1)

Ac-T(K<sup>me3</sup>)QTA(R<sup>me2a</sup>)(K<sup>me2</sup>)STGGKAPRKQ, MH<sup>+</sup>=1982.1 Da (2)

Ac-(K<sup>me3</sup>)QTA(R<sup>me2a</sup>)(K<sup>me2</sup>)STGGKAPRKQ, MH<sup>+</sup>=1881.0 Da (3)

Ac-QTA(R<sup>me2a</sup>)(K<sup>me2</sup>)STGGKAPRKQ-Na<sup>+</sup>, MH<sup>+</sup>=1733.9 Da (4)

Ac-QTA(R<sup>me2a</sup>)(K<sup>me2</sup>)STGGKAPRKQ, MH<sup>+</sup>=1710.9 Da (5)

Ac-QTA(R<sup>me2a</sup>)(K<sup>me2</sup>)STGGKAPRKQ, MH<sup>+</sup>=1582.9 Da (6)

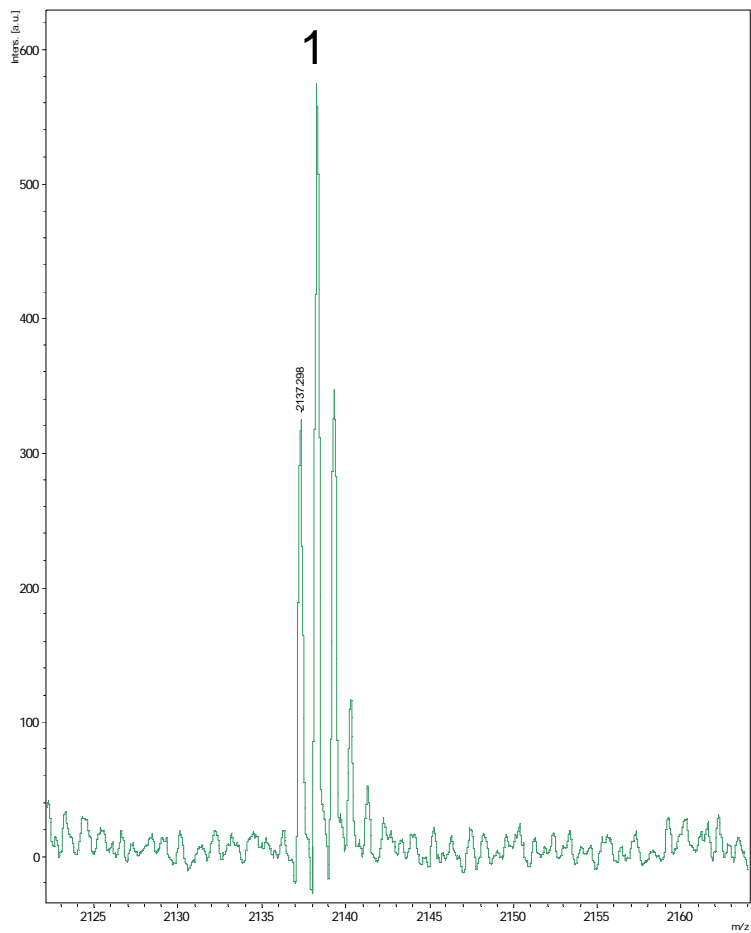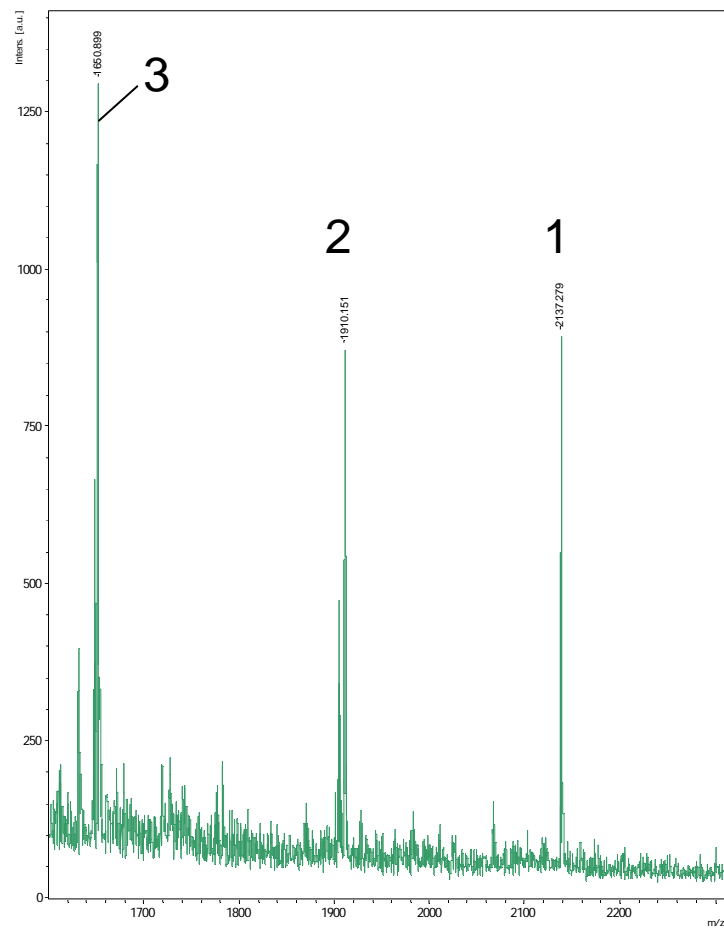

**Peptide J4, H3 7-26, Ac-ARKSTGGKAPRKQLATKAAR**

Ac-ARKSTGGKAPRKQLATKAAR,  $MH^+=2137.3$  Da (1)

Ac-KSTGGKAPRKQLATKAAR,  $MH^+=1910.1$  Da (2)

TGGKAPRKQLATKAAR,  $MH^+=1653.0$  Da (3)

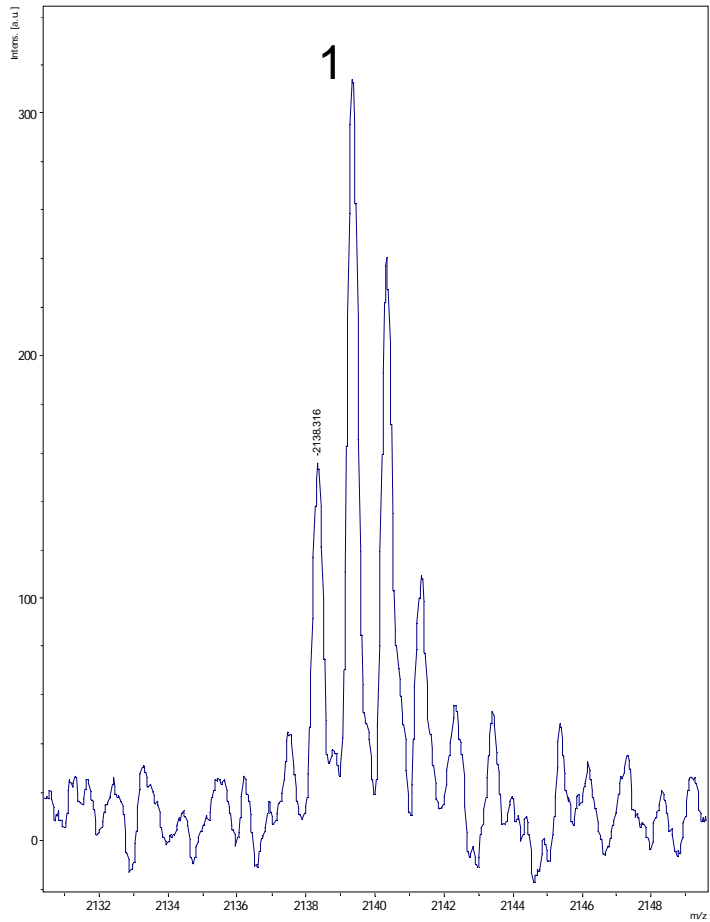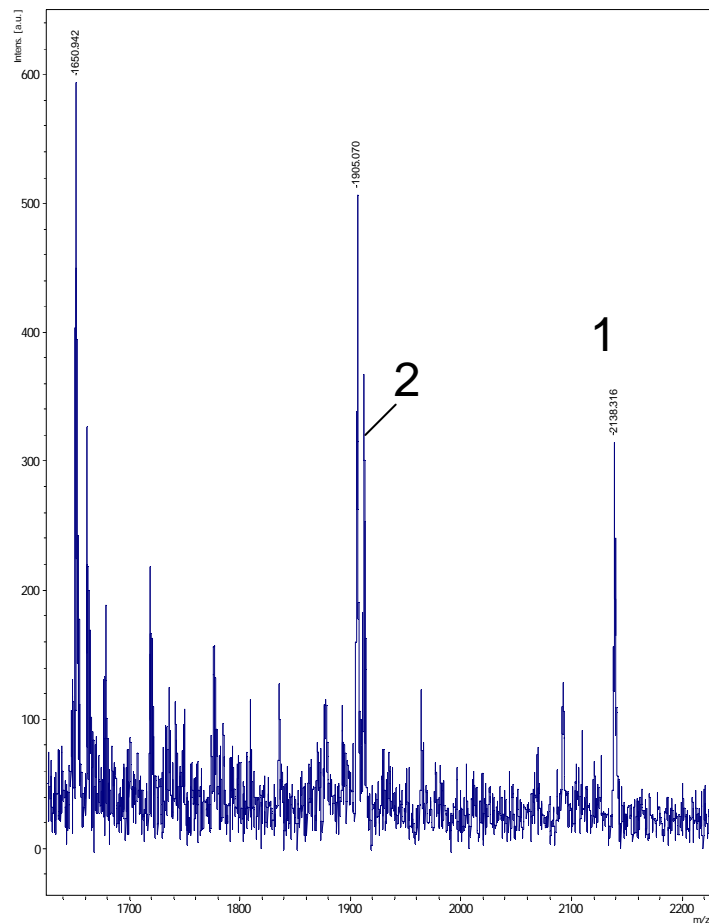

**Peptide J10, H3 7-26 R17citr, Ac-ARKSTGGKAP(R<sup>Citr</sup>)KQLATKAAR**

Ac-ARKSTGGKAP(R<sup>Citr</sup>)KQLATKAAR, MH<sup>+</sup>=2138.3 Da (1)

Ac-KSTGGKAP(R<sup>Citr</sup>)KQLATKAAR, MH<sup>+</sup>=1911.1 Da (2)

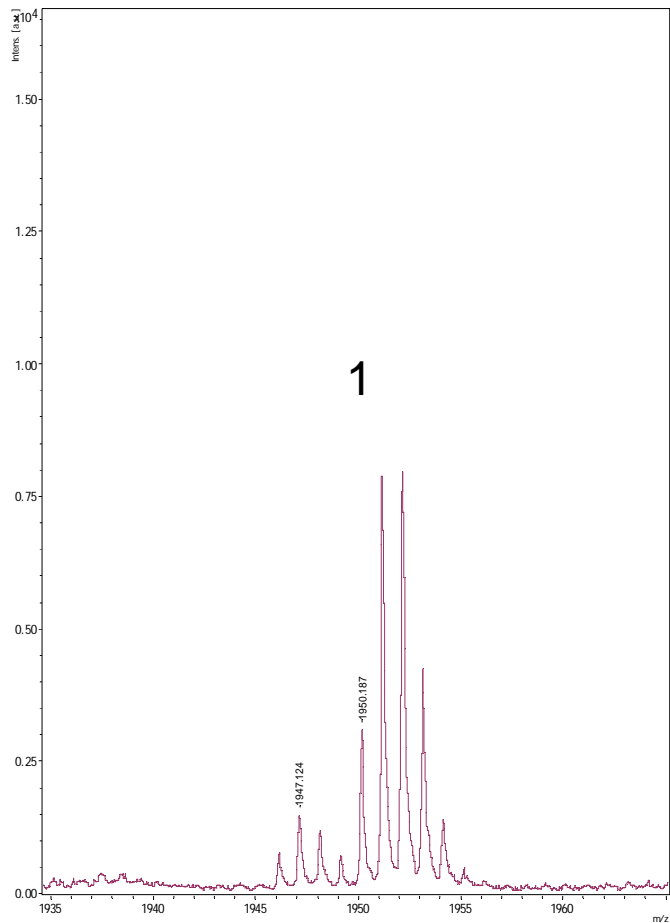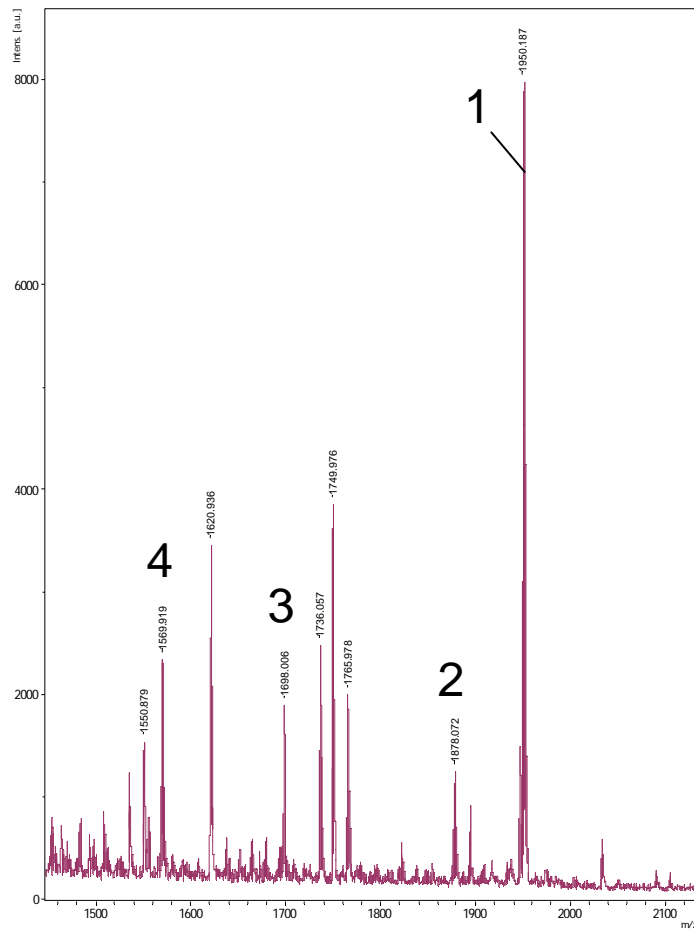

## Peptide J20, H3 16-35, Ac-PRKQLATKAARKSAPATGG

Ac-PRKQLATKAARKSAPATGG, MH<sup>+</sup>=1950.1 Da (1)

Ac-RKQLATKAARKSAPATGG-Na<sup>+</sup>, MH<sup>+</sup>=1876.1 Da (2)

Ac-KQLATKAARKSAPATGG, MH<sup>+</sup>=1697.0 Da (3)

Ac-QLATKAARKSAPATGG, MH<sup>+</sup>=1568.9 Da (4)

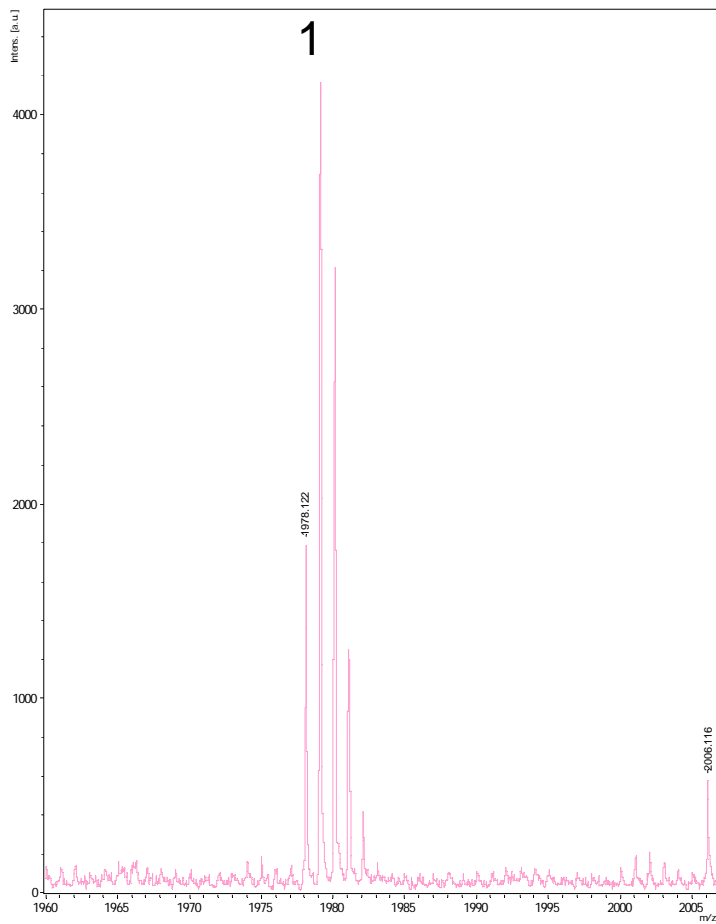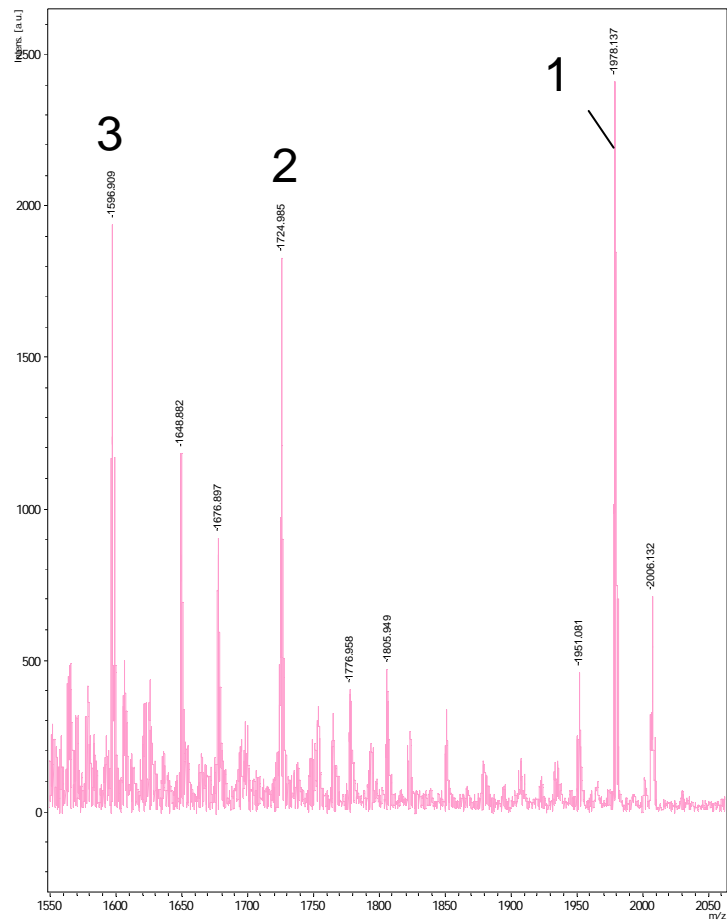

## Peptide K1, H3 16-35 K27me2, Ac-PRKQLATKAAR(K<sup>me2</sup>)SAPATGG

Ac-PRKQLATKAAR(K<sup>me2</sup>)SAPATGG, MH<sup>+</sup>=1978.1 Da (1)

Ac-KQLATKAAR(K<sup>me2</sup>)SAPATGG, MH<sup>+</sup>=1725.0 Da (2)

Ac-QLATKAAR(K<sup>me2</sup>)SAPATGG, MH<sup>+</sup>=1596.9 Da (3)



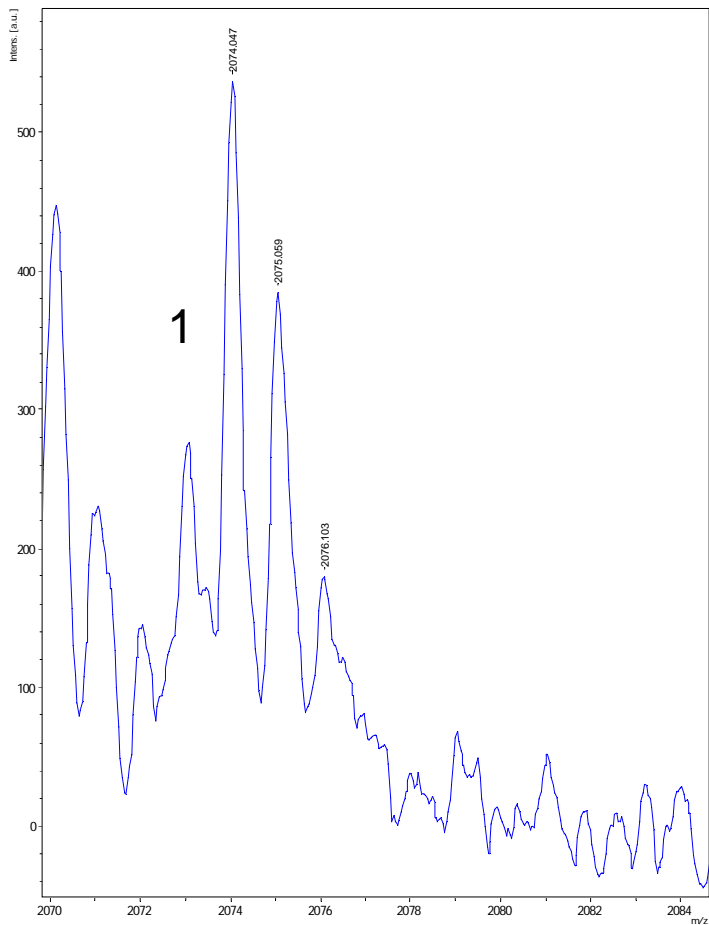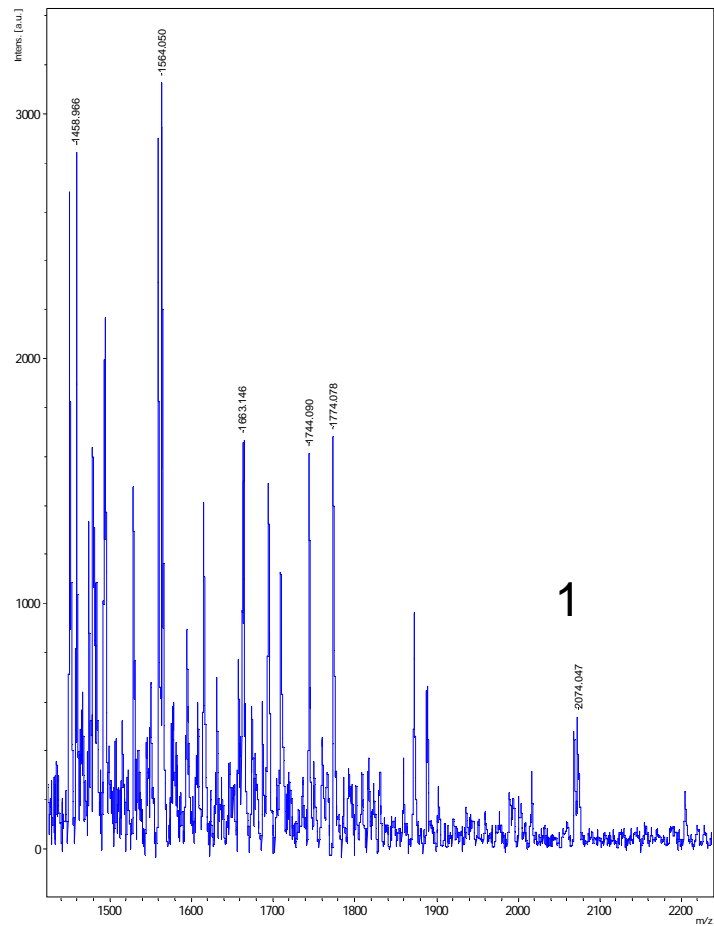

**Peptide K21, H3 16-35 K27me3/S28ph, Ac-PRKQLATKAAR(K<sup>me3</sup>)(S<sup>ph</sup>)APATGG**  
 Ac-PRKQLATKAAR(K<sup>me3</sup>)(S<sup>ph</sup>)APATGG, MH<sup>+</sup>=2072.1 Da (1)

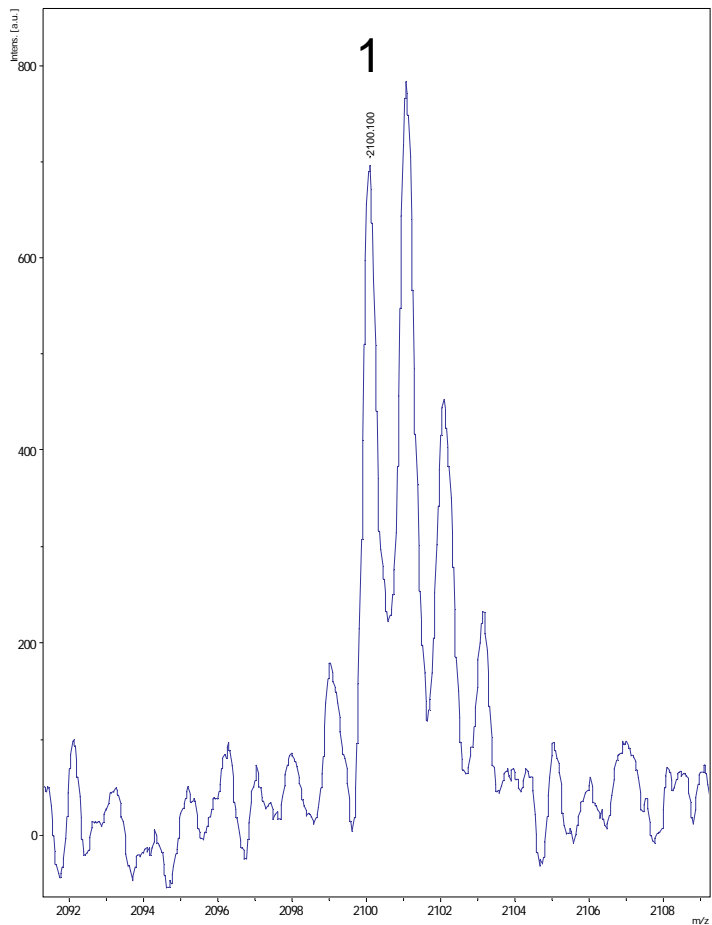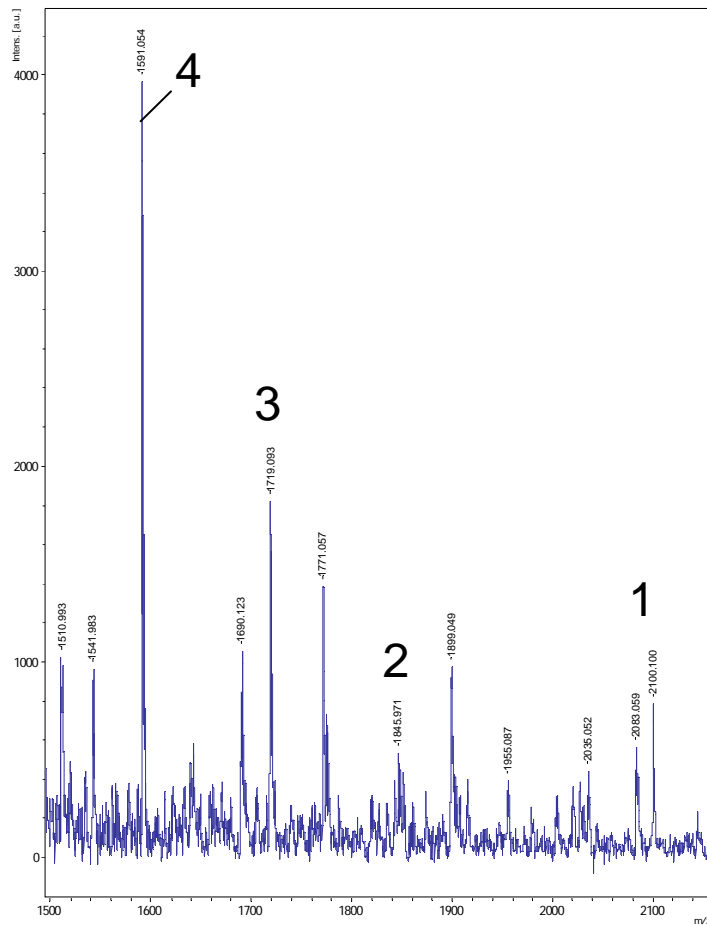

**Peptide L1, H3 16-35 R26me2s/K27me3/S28ph, Ac-PRKQLATKAA(R<sup>me2s</sup>)(K<sup>me3</sup>)(S<sup>ph</sup>)APATGG**

Ac-PRKQLATKAA(R<sup>me2s</sup>)(K<sup>me3</sup>)(S<sup>ph</sup>)APATGG, MH<sup>+</sup>=2100.2 Da (1)

Ac-KQLATKAA(R<sup>me2s</sup>)(K<sup>me3</sup>)(S<sup>ph</sup>)APATGG, MH<sup>+</sup>=1847.0 Da (2)

Ac-QLATKAA(R<sup>me2s</sup>)(K<sup>me3</sup>)(S<sup>ph</sup>)APATGG, MH<sup>+</sup>=1718.9 Da (3)

Ac-LATKAA(R<sup>me2s</sup>)(K<sup>me3</sup>)(S<sup>ph</sup>)APATGG, MH<sup>+</sup>=1590.8 Da (4)

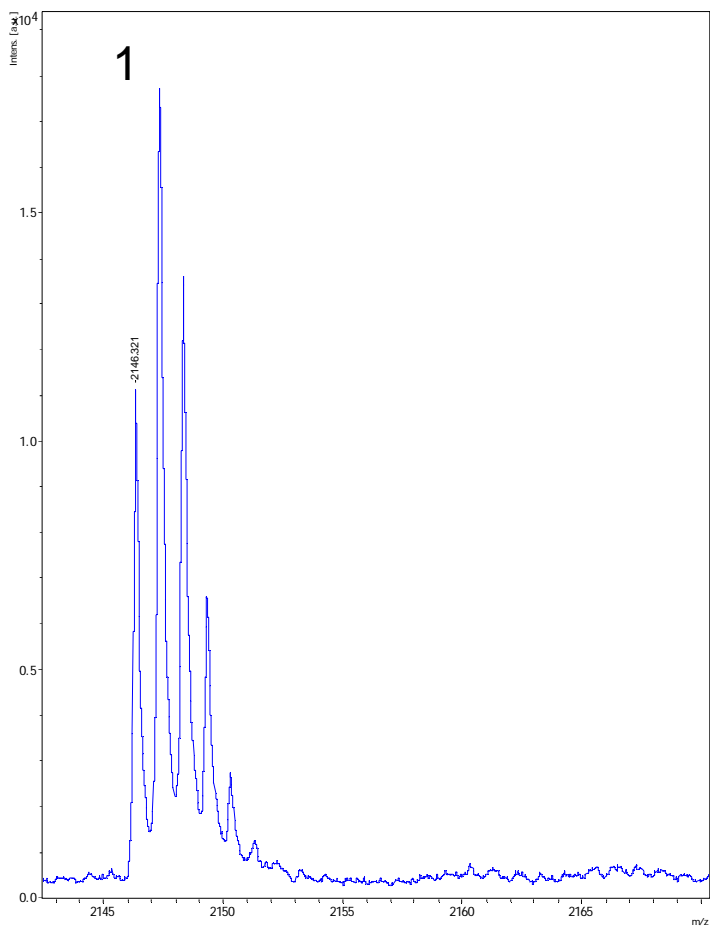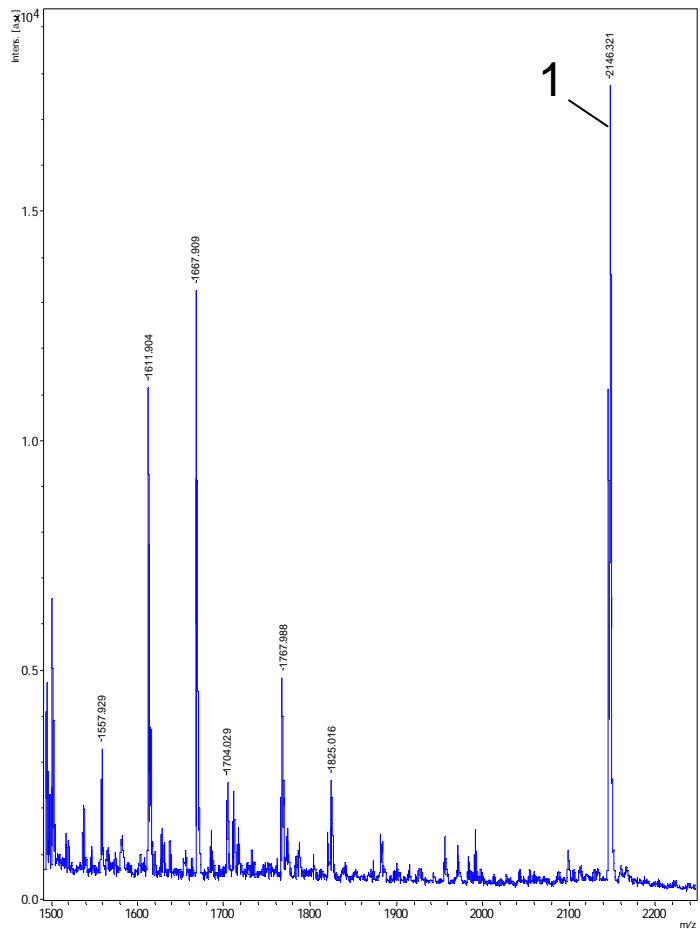

**Peptide L10, H3 26-45 K36me3, Ac-RKSAPATGGV(K<sup>me3</sup>)KPHRYRPG**  
 Ac-RKSAPATGGV(K<sup>me3</sup>)KPHRYRPG, MH<sup>+</sup>=2146.2 Da (1)

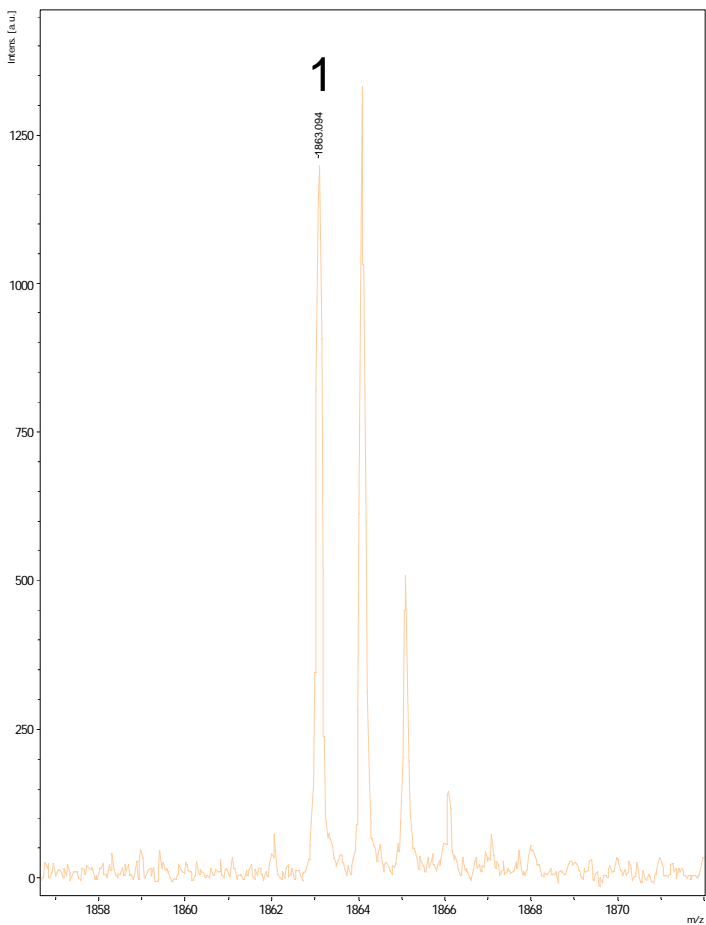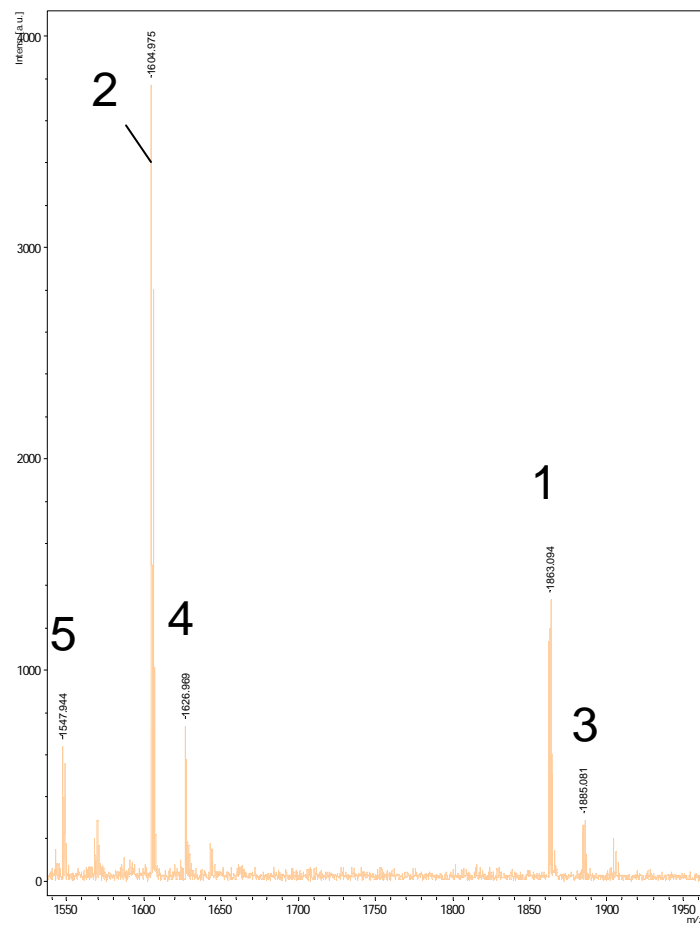

**Peptide L12, H4 1-19, SGRGKGGKGLGKGGAKRHR**

SGRGKGGKGLGKGGAKRHR,  $MH^+=1863.1$  Da (1)

Ac-GKGGKGLGKGGAKRHR,  $MH^+=1604.9$  Da (2)

SGRGKGGKGLGKGGAKRHR- $Na^+$ ,  $MH^+=1886.1$  Da (3)

Ac-GKGGKGLGKGGAKRHR- $Na^+$ ,  $MH^+=1627.9$  Da (4)

Ac-KGGKGLGKGGAKRHR,  $MH^+=1547.9$  Da (5)

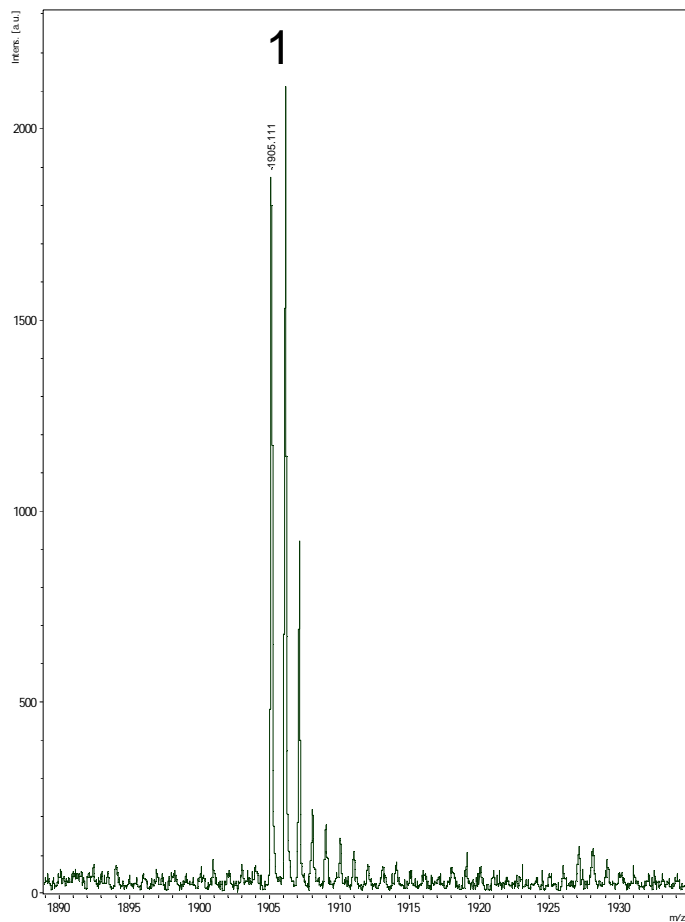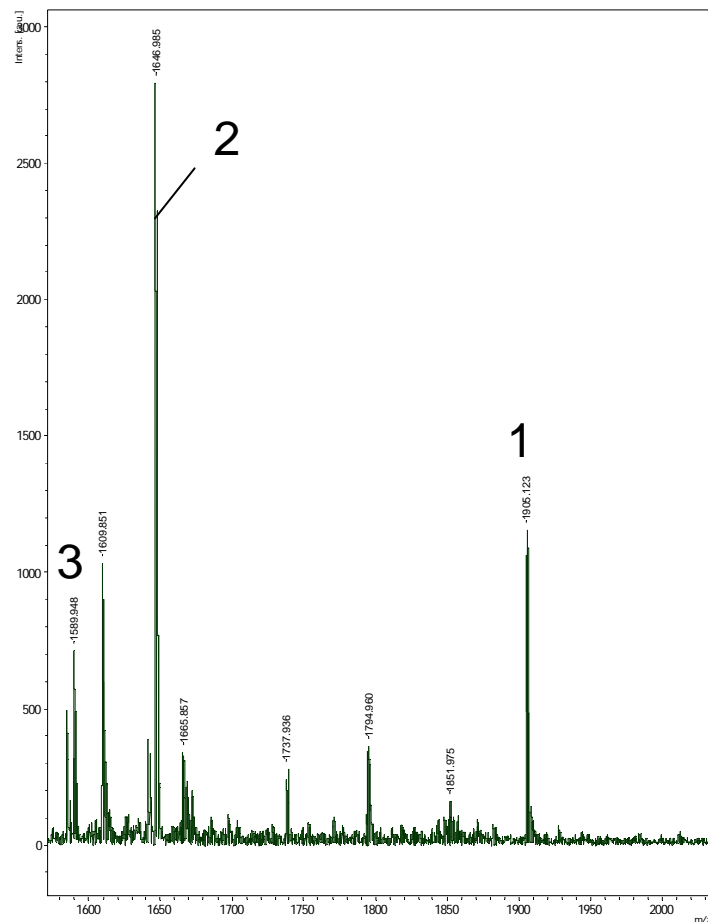

**Peptide L19, H4 1-19 K16ac, SGRGKGGKGLGKGGGA(K<sup>ac</sup>)RHR**

SGRGKGGKGLGKGGGA(K<sup>ac</sup>)RHR, MH<sup>+</sup>=1905.1 Da (1)

Ac-GKGGKGLGKGGGA(K<sup>ac</sup>)RHR, MH<sup>+</sup>=1646.9 Da (2)

SGRGKGGKGLGKGGGA(K<sup>ac</sup>)RHR, MH<sup>+</sup>=1589.9 Da (3)

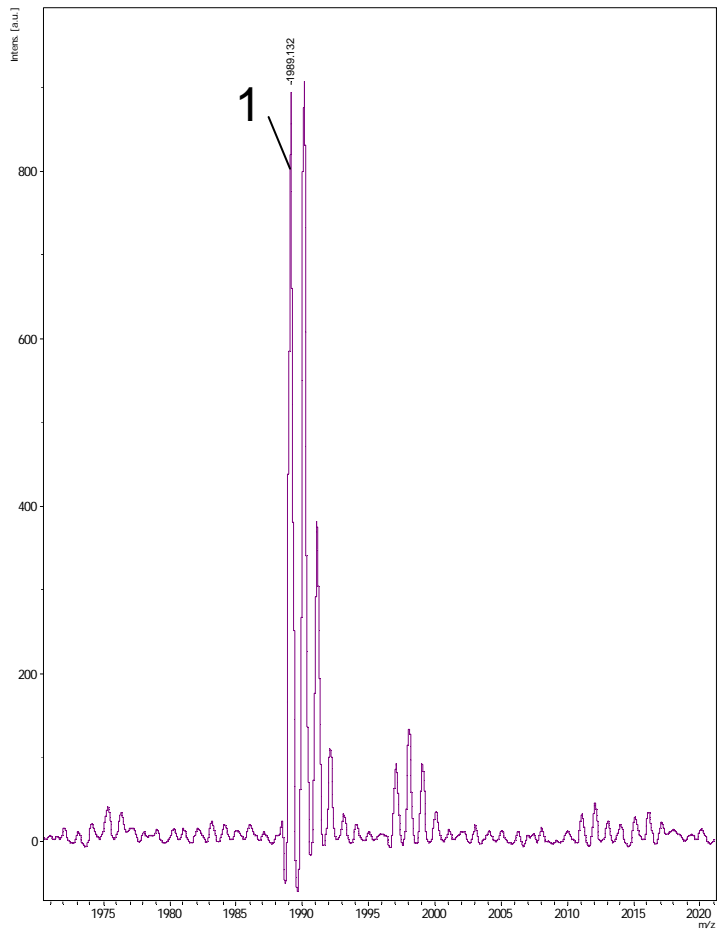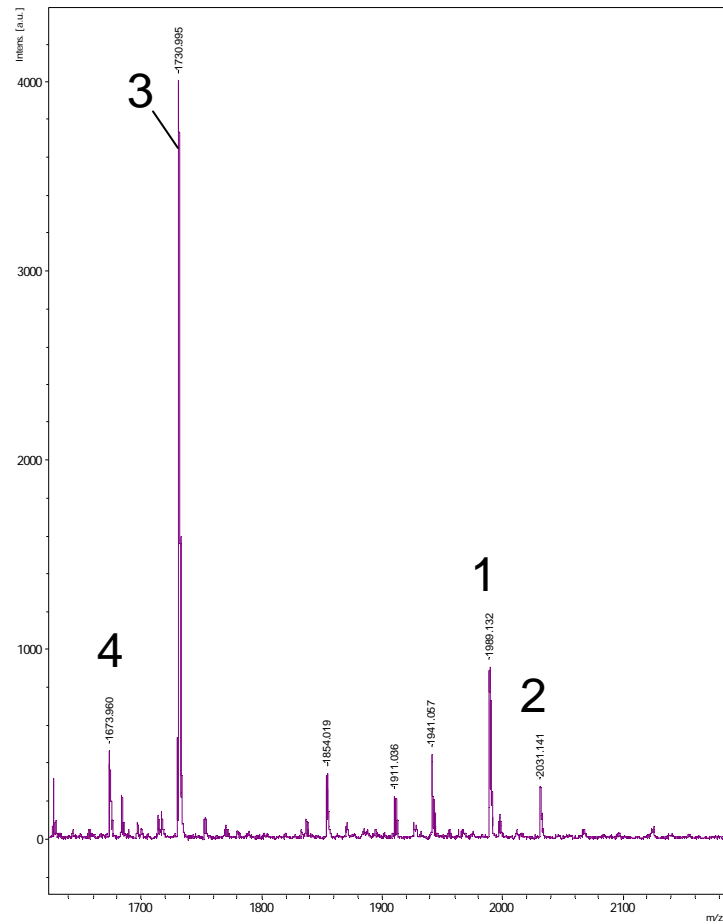

**Peptide M11, H4 1-19 K5ac/K8ac/K12ac, SGRGK(ac)GGK(ac)GLGK(ac)GGAKRHR**

SGRG(K<sup>ac</sup>)GG(K<sup>ac</sup>)GLG(K<sup>ac</sup>)GGAKRHR, MH<sup>+</sup>=1989.1 Da (1)

Ac-SGRG(K<sup>ac</sup>)GG(K<sup>ac</sup>)GLG(K<sup>ac</sup>)GGAKRHR, MH<sup>+</sup>=2030.1 Da (2)

Ac-G(K<sup>ac</sup>)GG(K<sup>ac</sup>)GLG(K<sup>ac</sup>)GGAKRHR, MH<sup>+</sup>=1730.9 Da (3)

Ac-(K<sup>ac</sup>)GG(K<sup>ac</sup>)GLG(K<sup>ac</sup>)GGAKRHR, MH<sup>+</sup>=1673.9 Da (4)

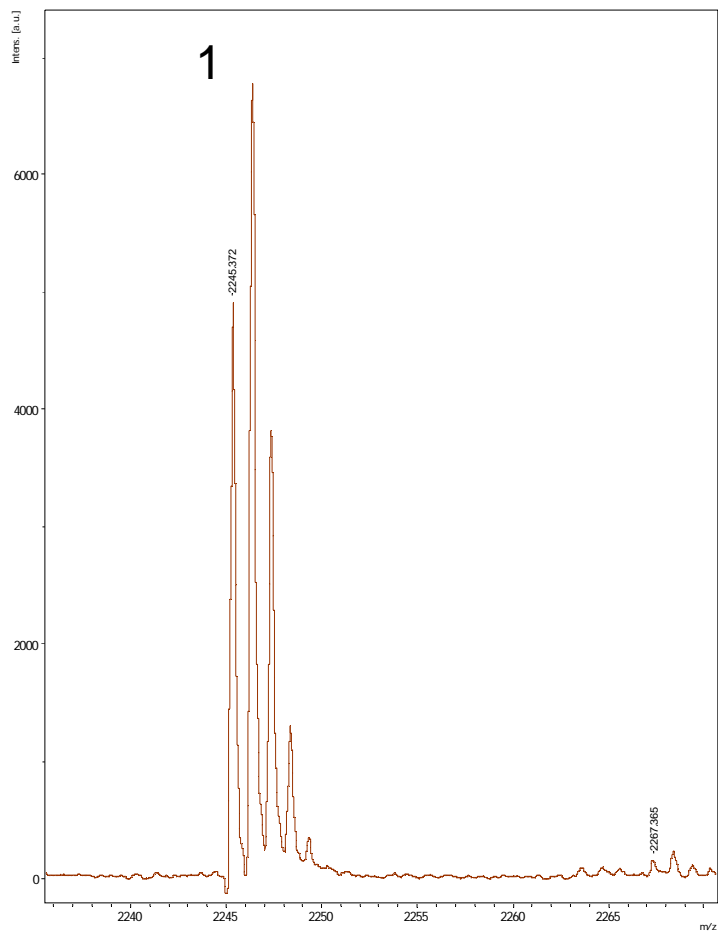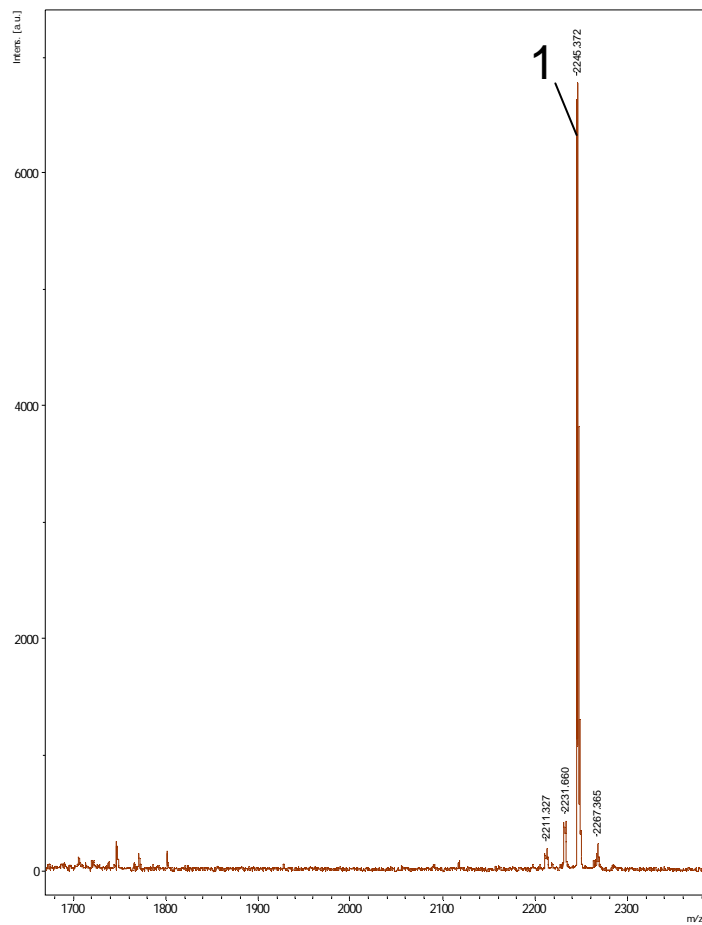

**Peptide M18, H4 11-30, Ac-GKGGAKRHRKVL RDNIQGIT**  
Ac-GKGGAKRHRKVL RDNIQGIT,  $MH^+=2245.3$  Da (1)

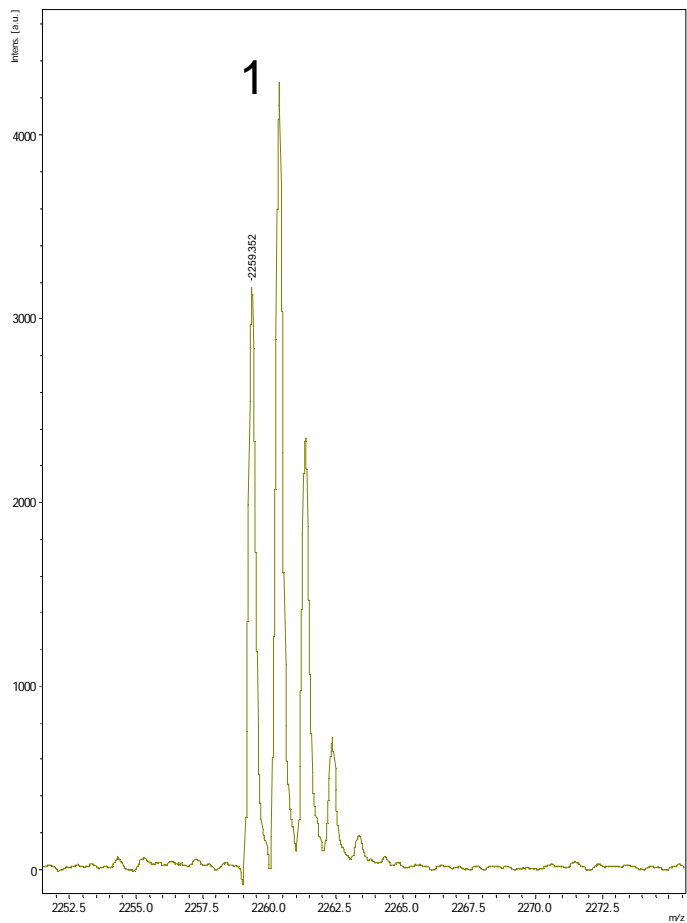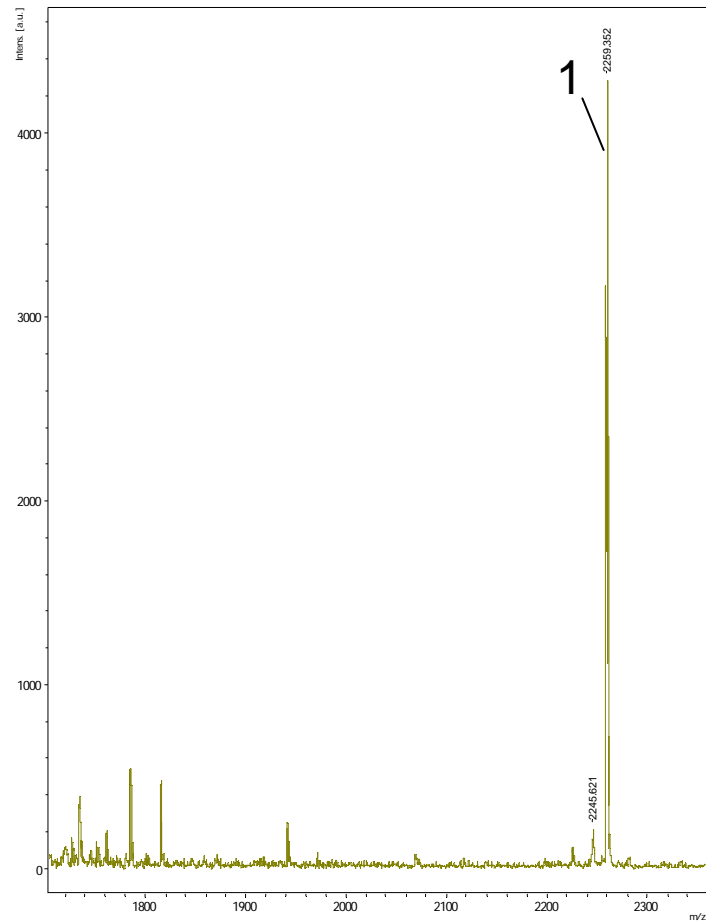

**Peptide N1, H4 11-30 K20me1, Ac-GKGGAKRHRK(me1)VLRDNIQGIT**  
Ac-GKGGAKRHR(K<sup>me1</sup>)VLRDNIQGIT, MH<sup>+</sup>=2259.3 Da (1)



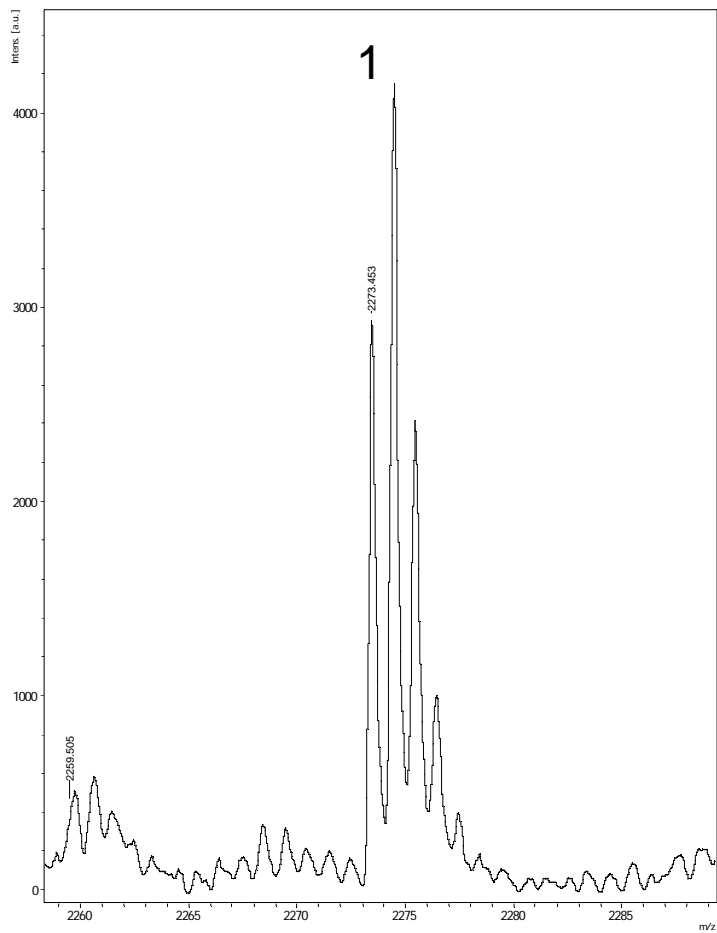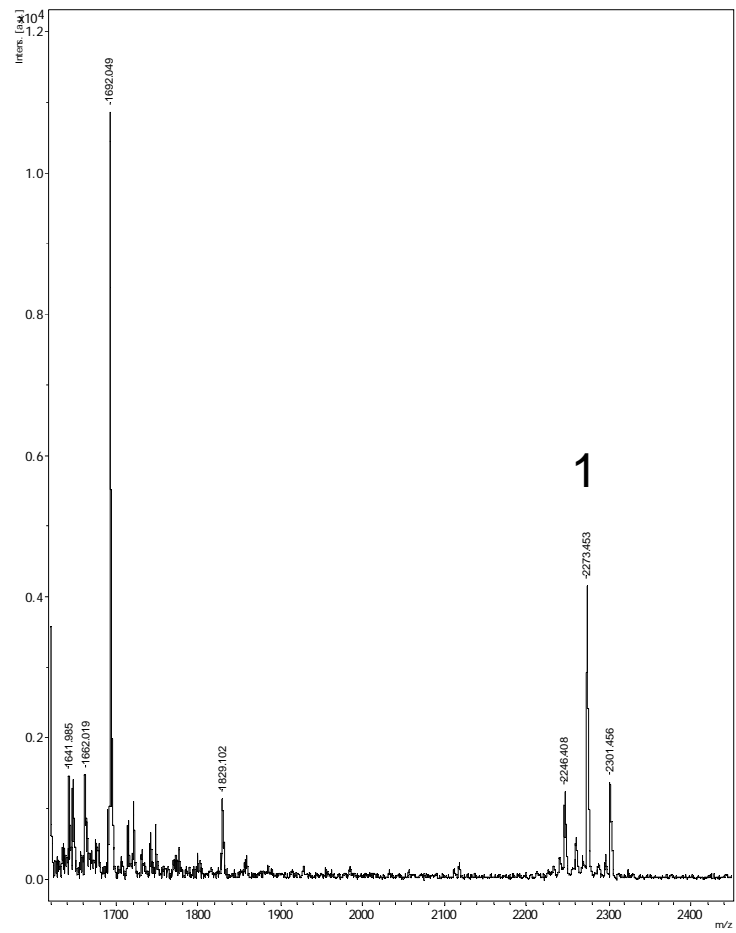

**Peptide N2, H4 11-30 K20me2, Ac-GKGGAKRHR(K<sup>me2</sup>)VLRDNIQGIT**  
 Ac-GKGGAKRHR(K<sup>me2</sup>)VLRDNIQGIT, MH<sup>+</sup>=2273.3 Da (1)

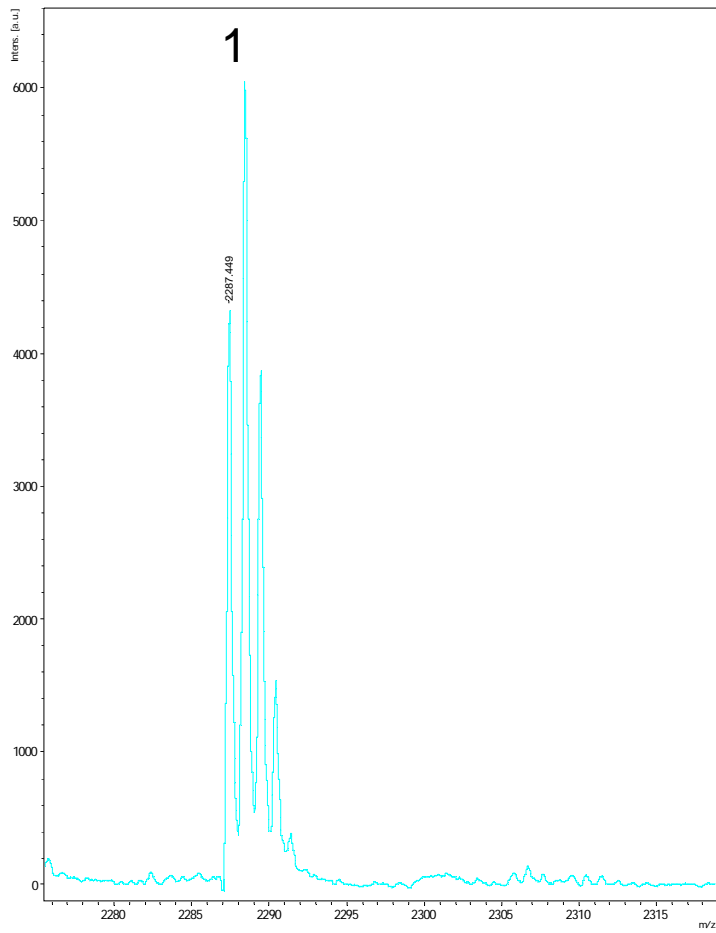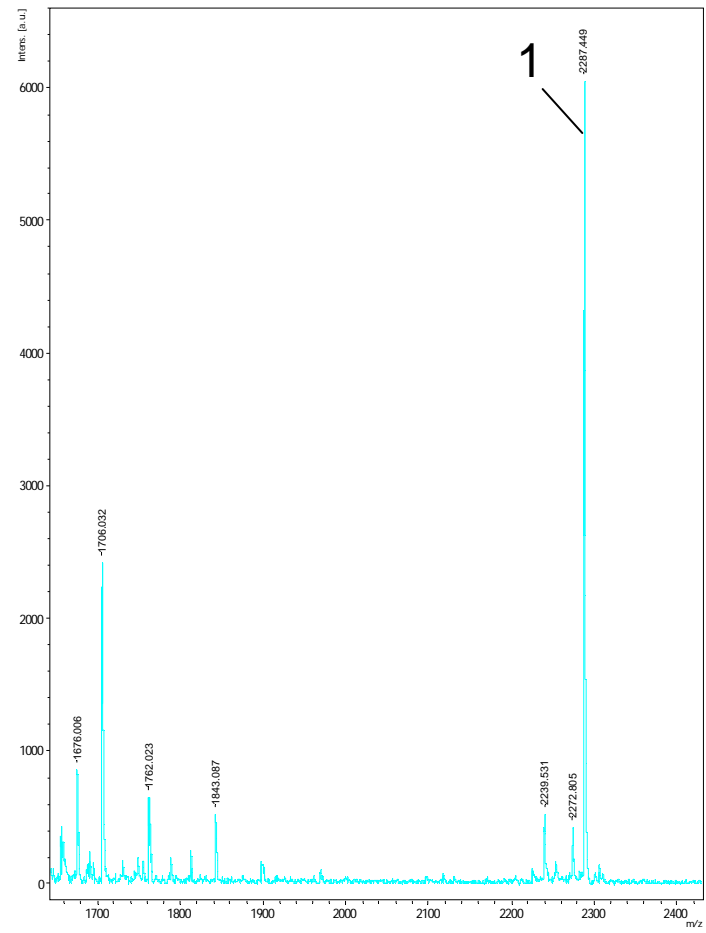

**Peptide N3, H4 11-30 K20me3, Ac-GKGGAKRHR(K<sup>me3</sup>)VLRDNIQGIT**  
 Ac-GKGGAKRHR(K<sup>me3</sup>)VLRDNIQGIT, MH<sup>+</sup>=2287.3 Da (1)

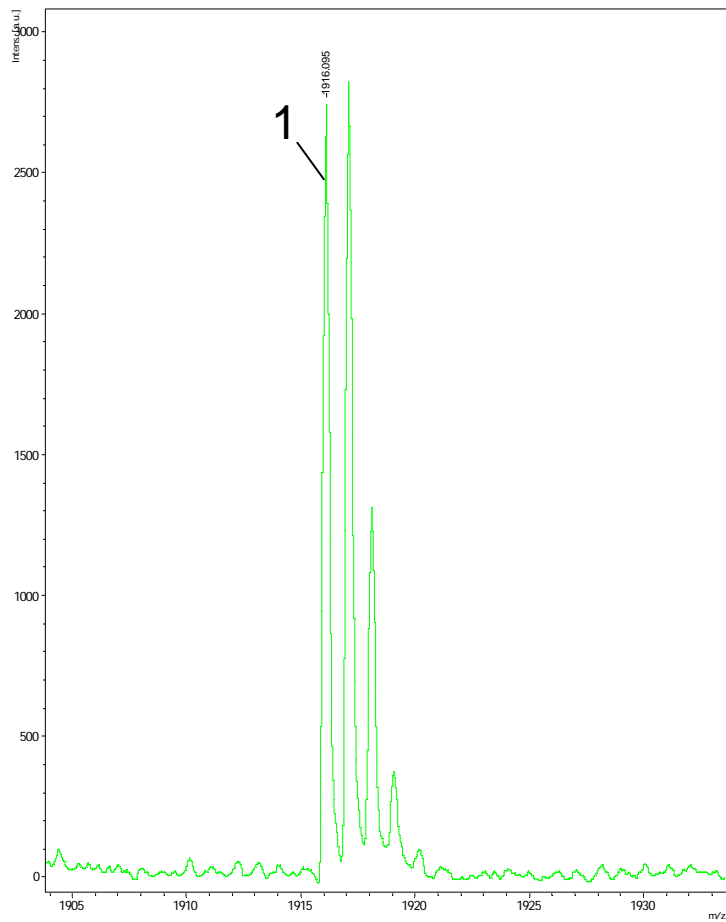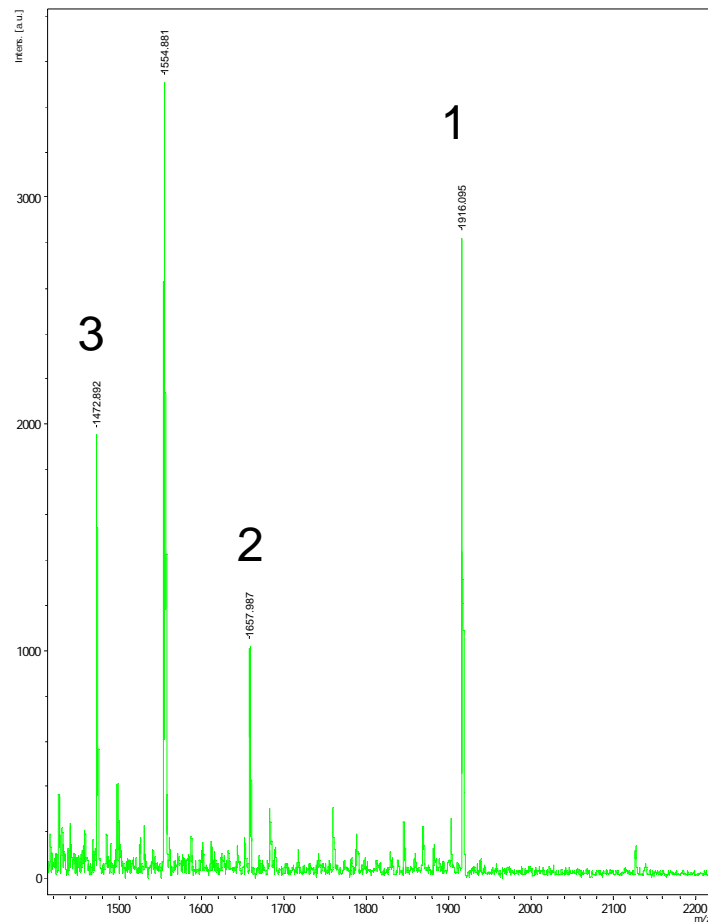

### Peptide O12, H2A 1-19, SGRGKQGGKARAKAKSRSS

SGRGKQGGKARAKAKSRSS,  $MH^+ = 1916.1$  Da (1)

Ac-GKQGGKARAKAKSRSS,  $MH^+ = 1657.9$  Da (2)

Ac-QGGKARAKAKSRSS,  $MH^+ = 1572.8$  Da (3)

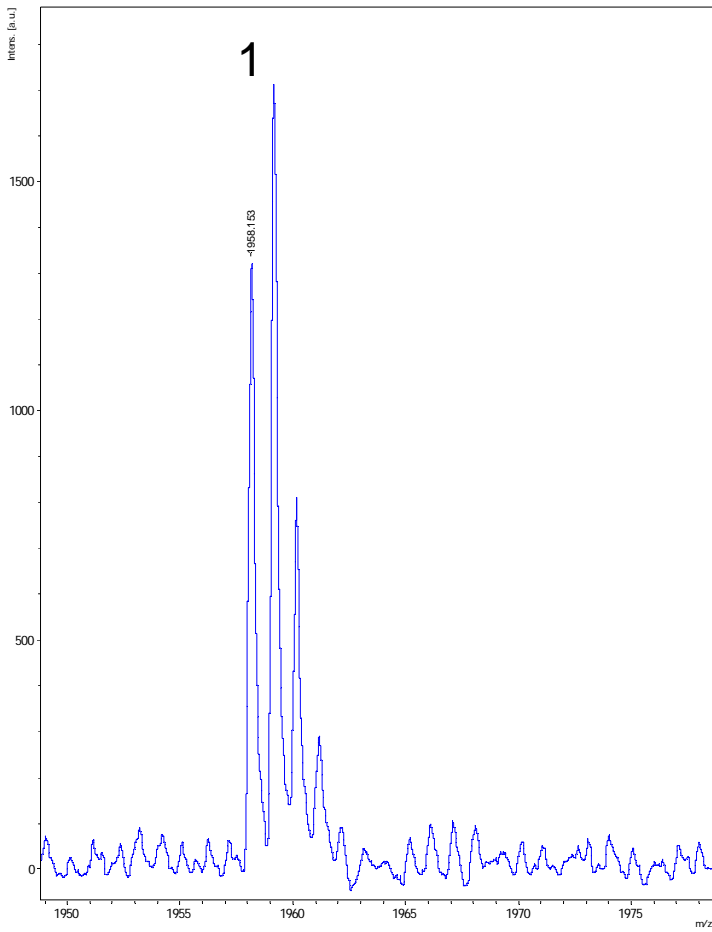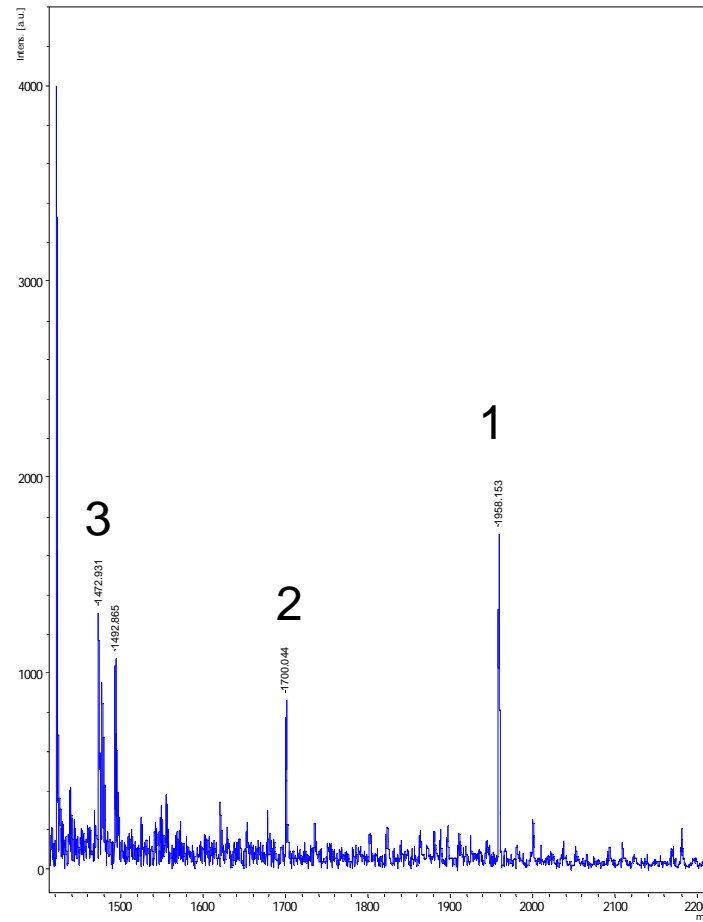

**Peptide O14, H2A K5Ac, SGRG(Ac)QGGKARAKAKSRSS**

SGRG(K<sup>ac</sup>)QGGKARAKAKSRSS, MH<sup>+</sup>= 1958.1 Da (1)

Ac-G(K<sup>ac</sup>)QGGKARAKAKSRSS, MH<sup>+</sup>= 1699.9 Da (2)

Ac-QGGKARAKAKSRSS, MH<sup>+</sup>= 1472.8 Da (3)

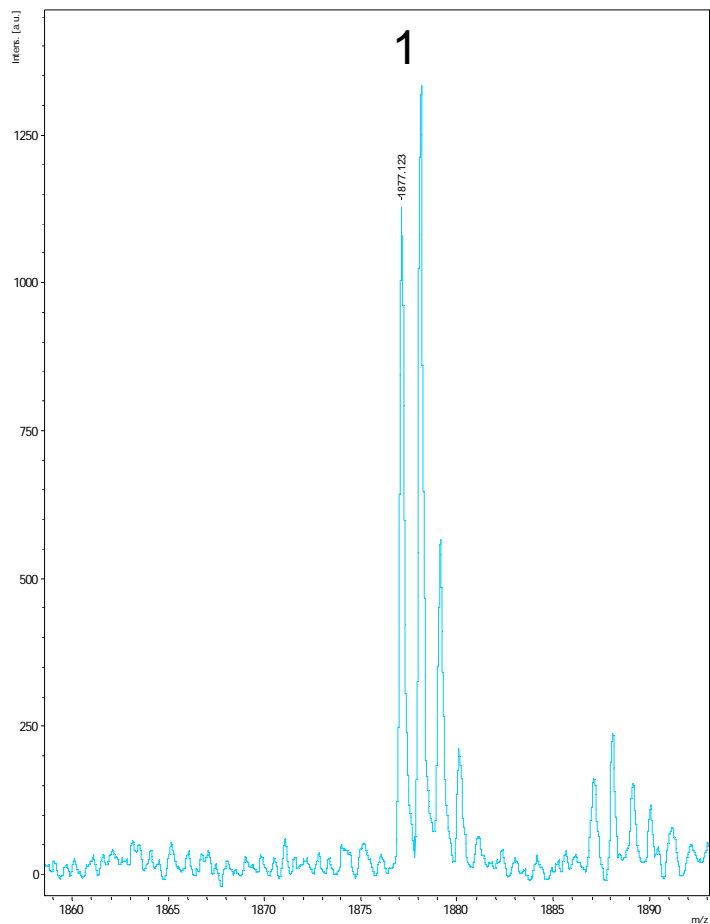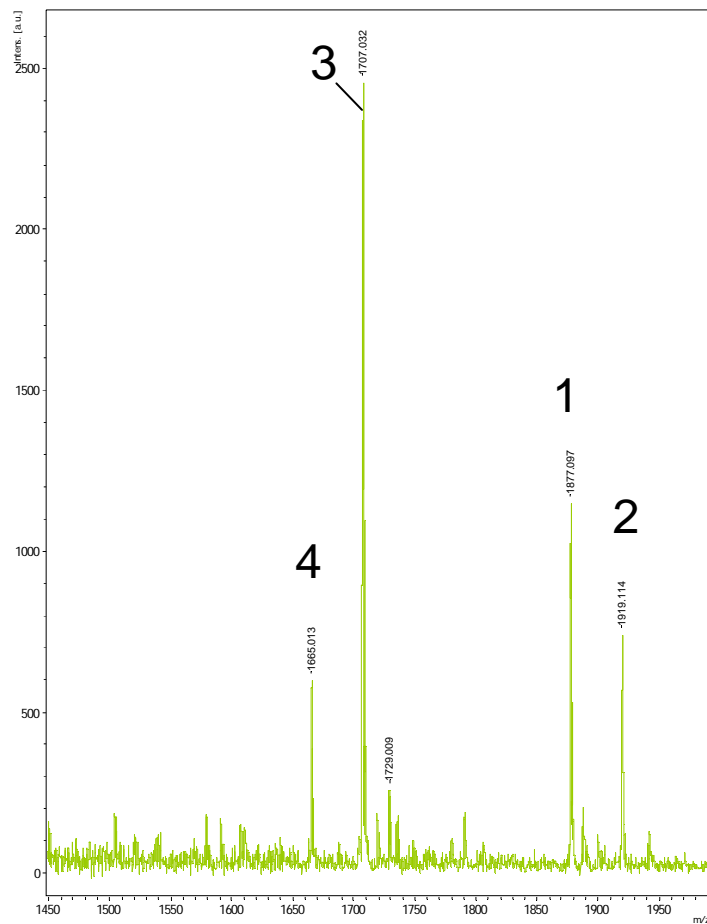

### Peptide P4, H2B 1-19, PDKSAPAPKKGSKKAVT

PDKSAPAPKKGSKKAVT,  $MH^+=1877.1$  Da (1)

Ac-PDKSAPAPKKGSKKAVT,  $MH^+=1919.1$  Da (2)

Ac-PAKSAPAPKKGSKKAVT,  $MH^+=1707.0$  Da (3)

PAKSAPAPKKGSKKAVT,  $MH^+=1665.0$  Da (4)

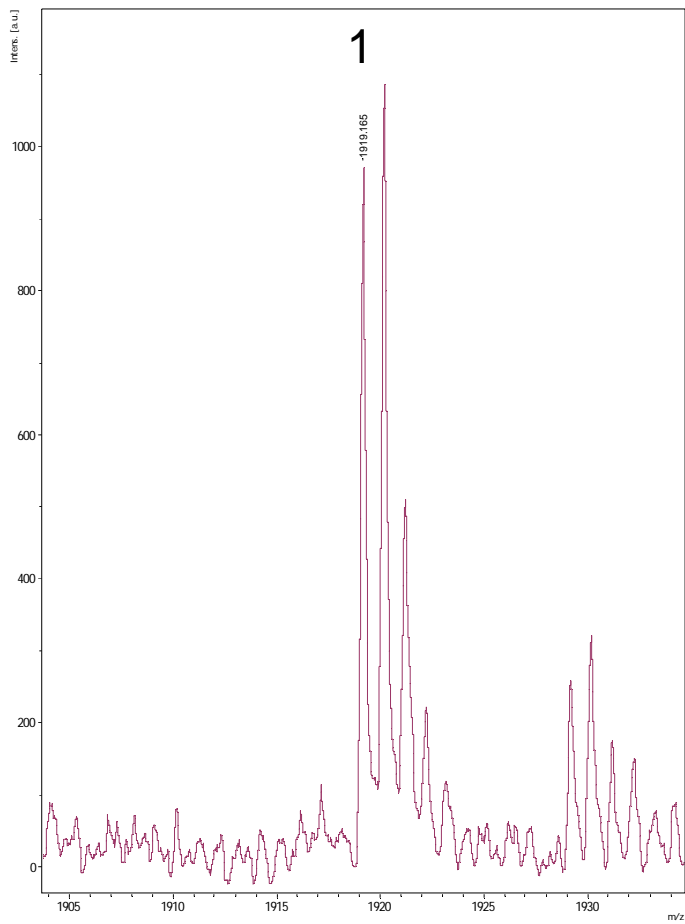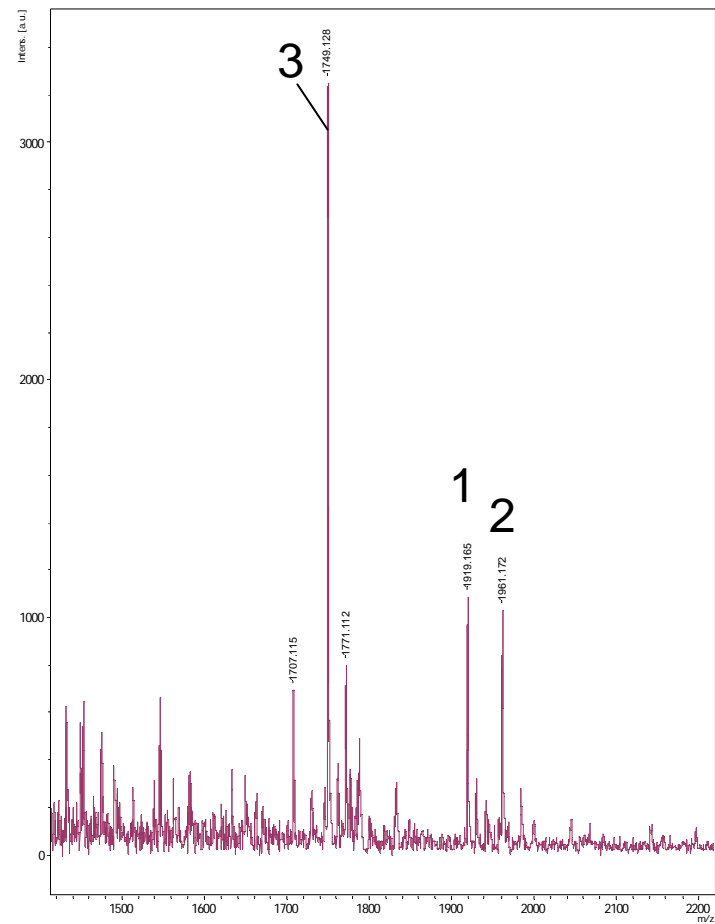

## Peptide P6, H2B 1-19 K12Ac, PDPAKSAPAPK(K<sup>Ac</sup>)GSKKAVT

PDPAKSAPAPK(K<sup>Ac</sup>)GSKKAVT, MH<sup>+</sup>=1919.1 Da (1)

Ac-PDPAKSAPAPK(K<sup>Ac</sup>)GSKKAVT, MH<sup>+</sup>=1960.1 Da (2)

Ac-PAKSAPAPK(K<sup>Ac</sup>)GSKKAVT, MH<sup>+</sup>=1749.0 Da (3)

## Detailed specificity analysis of antibodies binding to modified Histone tails with peptide arrays

Ina Bock<sup>1</sup>, Arunkumar Dhayalan<sup>1</sup>, Srikanth Kudithipudi<sup>1</sup>, Ole Brandt<sup>2</sup>, Philipp Rathert<sup>3</sup>, & Albert Jeltsch<sup>1,\*</sup>

Supplemental Figure 2: Dot blot peptide binding experiments with purified peptides and antibodies. Antibody specificities were confirmed by dot blot experiments carried out with purified (>80%) peptides containing H3K9me1 (R T K Q T A R K<sup>me1</sup> S T G G K A P R K Q), H3K9me3 (R T K Q T A R K<sup>me3</sup> S T G G K A P R K Q), H3K3me3/S10ph (A R T K Q T A R K<sup>me3</sup> S<sup>ph</sup> T G G K A P R K Q), H3K27me3 (A A R K<sup>me3</sup> S A P A T G G V K C) or H4K20me3 (A K R H R K<sup>me3</sup> V L R D N K C). The peptides were spotted on nitrocellulose, blocked, washed and incubated with antibodies as described for the arrays. The amounts of peptide per spot and the working dilutions of the antibodies were for antibody #11 20 pmol and 1:4000, #10 700 pmol and 1:250, #9 250 pmol and 1:120, #20 250 pmol and 1:100, #33 250 pmol, 1:2000.

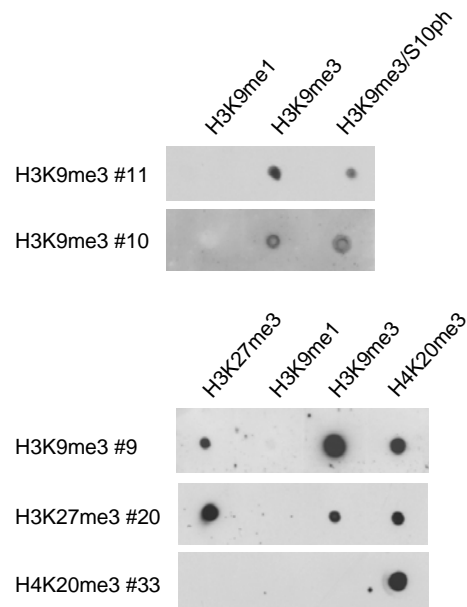

Supplement: epi0602_0256SD1.pdf [file epi0602_0256SD1.pdf]
